# Supplementary material for: MicroRNA-132 promotes fibroblast migration via regulating RAS p21 protein activator 1 in skin wound healing
Source: PubMed Central journal article supplement (PMC5552762; doi:10.1038/s41598-017-07513-0), 2017-08-10
Supplement: 41598_2017_7513_MOESM1_ESM.pdf [file 41598_2017_7513_MOESM1_ESM.pdf]

# Supplementary Information for

## **MicroRNA-132 promotes fibroblast migration via regulating RAS p21 protein activator 1 in skin wound healing**

Xi Li<sup>1</sup>, Dongqing Li<sup>1</sup>, Jakob D. Wikström<sup>1,2</sup>, Andor Pivarcsi<sup>1</sup>, Enikő Sonkoly<sup>1,2</sup>, Mona Ståhle<sup>1,2</sup>, Ning Xu Landén<sup>1\*</sup>

<sup>1</sup>Unit of Dermatology and Venereology, Department of Medicine, Karolinska Institutet, Stockholm, Sweden. <sup>2</sup>Unit of Dermatology and Venereology, Karolinska University Hospital, Stockholm, Sweden

### **This PDF file includes:**

Supplementary Figures 1 – 3

Supplementary Tables 1 – 2

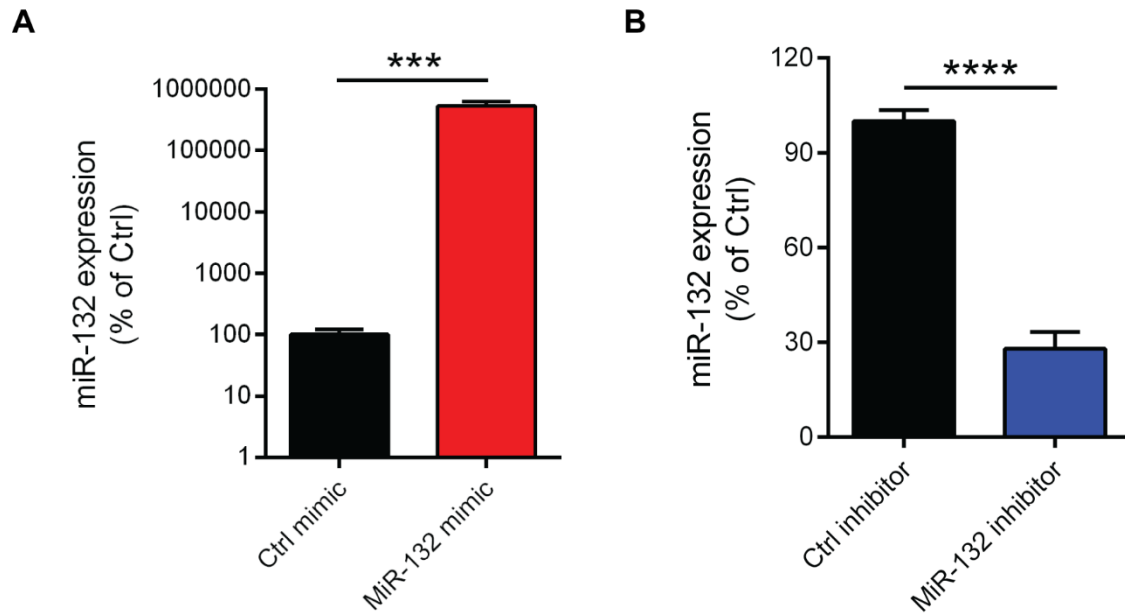

**Supplementary Figure S1: Modulation of miR-132 levels in human dermal fibroblasts.** QRT-PCR analysis of miR-132 expression in HDFs transfected with **(A)** 20nM miR-132 mimics or miRNA control mimics for 48 hours; **(B)** in HDFs transfected with 20nM miR-132 inhibitors or miRNA control inhibitors for 48 hours. The data are presented as mean  $\pm$  s.d. \*\*\*\*P < 0.0001 by Student's t-test.

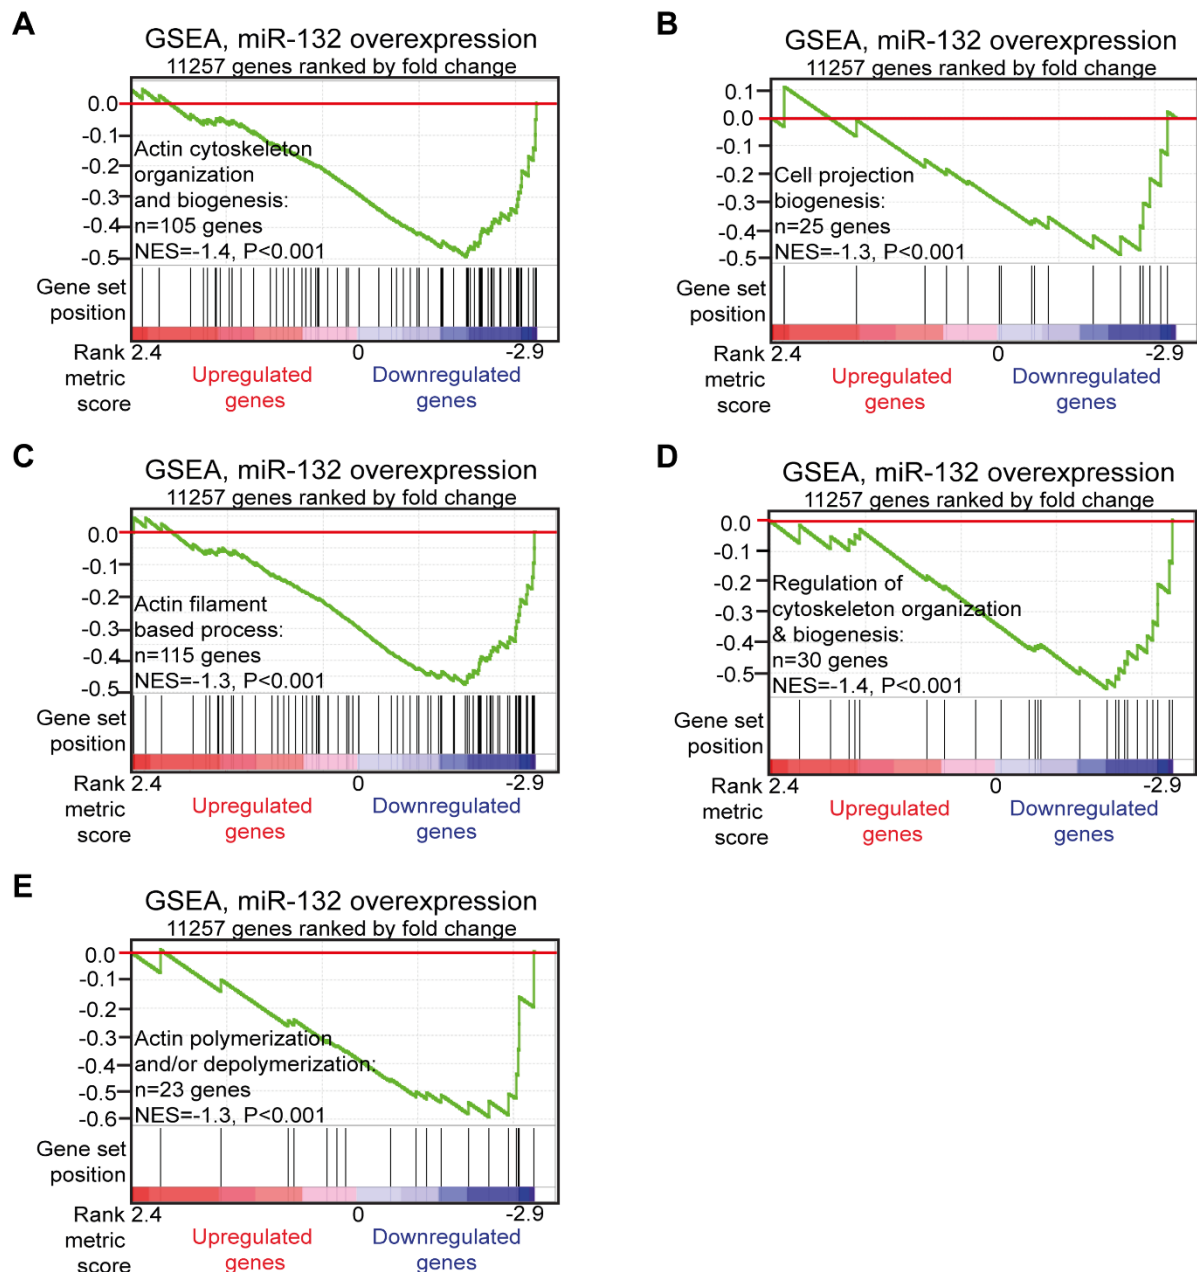

**Supplementary Figure S2: GSEA evaluated enrichment for the genes related to cell migration in the microarray data.** Genes in the microarray data of HDFs with miR-132 overexpression were ranked by fold change (miR-132 mimic / Ctrl mimic). GSEA evaluated enrichment within the profile data for the genes related to **(A)** actin cytoskeleton organization, **(B)** cell projection biogenesis, **(C)** actin filament based process, **(D)** regulation of cytoskeleton organization and biogenesis and **(E)** actin polymerization and/or depolymerization.

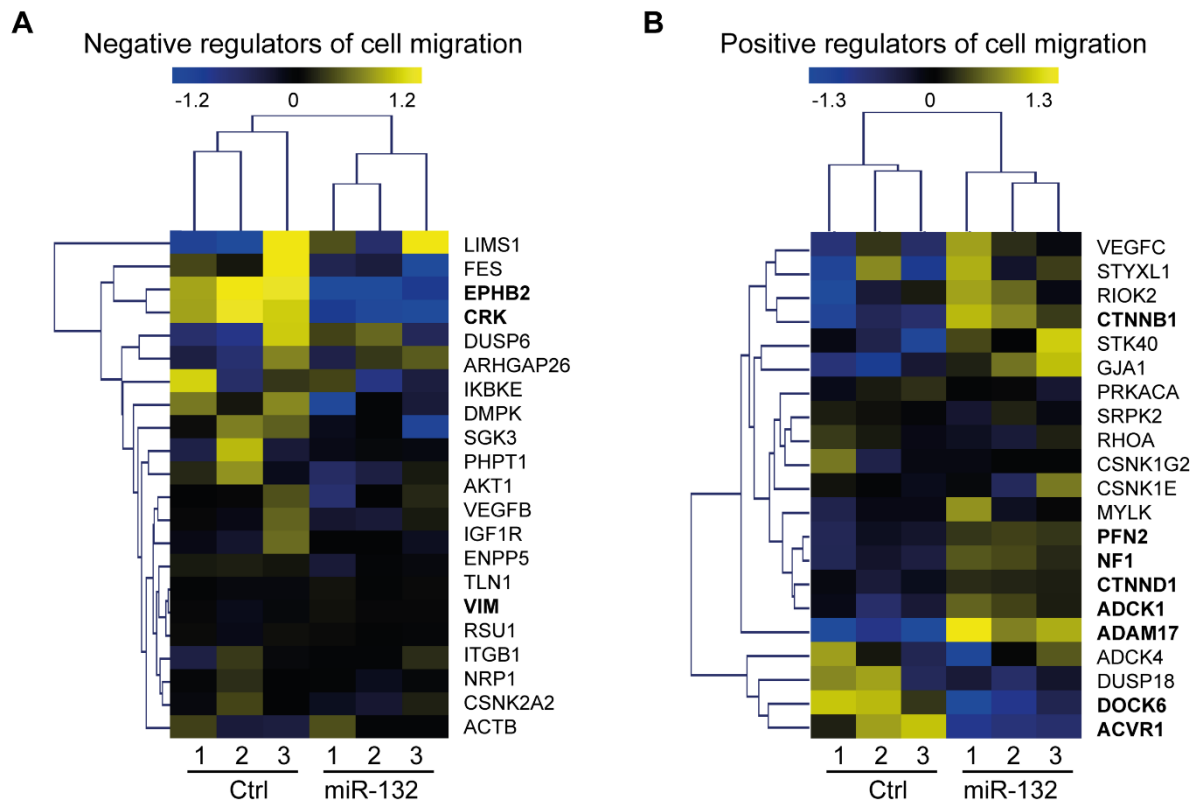

**Supplementary Figure S3: The expression of cell migration regulators in human dermal fibroblast overexpressing miR-132.** Using siRNA-screening approach, a group of genes have been previously identified to either negatively or positively regulate cell migration. Heat map illustrates the expression of these genes in the fibroblast overexpressing miR-132. Colour intensity is scaled within each row so that the highest expression value corresponds to bright yellow and the lowest to bright blue. The names of the genes significantly ( $P < 0.05$ ) changed by miR-132 overexpression were highlighted with bold font.

**Supplementary Table S1: Information of healthy donors**

| Donor   | Gender | Age (y) | Surgical wounds <i>in vivo</i> |       |       |       | Analysis |
|---------|--------|---------|--------------------------------|-------|-------|-------|----------|
|         |        |         | Day 0                          | Day 1 | Day 6 | Day 7 |          |
| 1       | Male   | 33      | √                              | √     |       | √     | LCM      |
| 2       | Male   | 34      | √                              | √     |       | √     | LCM      |
| 3       | Female | 58      | √                              | √     |       | √     | LCM      |
| 4       | Female | 53      | √                              | √     |       | √     | LCM      |
| 5       | Male   | 23      | √                              | √     |       | √     | LCM      |
| 6 (V1)  | Male   | 27      |                                |       | √     |       | MACS     |
| 7 (V2)  | Male   | 33      |                                |       | √     |       | MACS     |
| 8 (V3)  | Female | 36      |                                |       | √     |       | MACS     |
| 9 (V4)  | Male   | 25      |                                |       | √     |       | MACS     |
| 10 (V5) | Female | 38      |                                |       | √     |       | MACS     |

**Supplementary table 2: miR-132 regulated transcripts in human primary fibroblasts**

The presence of miR-132 target binding sites was predicted by TargetScan.

| Pre-miR-Ctrl (Log2) |          |          | Pre-miR-132 (Log2) |          |          | Average      |             | Fold Change (miR-132 vs Ctrl) | p-value     | Gene Assignment |          |                                                                      | Predicted miR-132 binding sites |
|---------------------|----------|----------|--------------------|----------|----------|--------------|-------------|-------------------------------|-------------|-----------------|----------|----------------------------------------------------------------------|---------------------------------|
| Sample 1            | Sample 2 | Sample 3 | Sample 1           | Sample 2 | Sample 3 | Pre-miR-Ctrl | Pre-miR-132 |                               |             | Public id       | Symbol   | Name                                                                 |                                 |
| 6,45                | 6,45     | 6,5      | 4,8                | 4,2      | 4,44     | 88,4547      | 22,6477     | -3,9057                       | 2,42532E-05 | NM_144601       | CMTM3    | CKLF-like MARVEL transmembrane domain containing 3                   | Yes                             |
| 6,59                | 6,58     | 6,51     | 4,66               | 4,83     | 4,65     | 94,3817      | 26,277      | -3,5918                       | 4,09223E-06 | ENST00000300571 | GPRC5B   | G protein-coupled receptor, family C, group 5, member B              | Yes                             |
| 7,45                | 7,4      | 7,45     | 5,63               | 5,57     | 5,76     | 172,8677     | 50,4063     | -3,4295                       | 1,64384E-06 | ENST00000233813 | IGFBP5   | insulin-like growth factor binding protein 5                         |                                 |
| 8,68                | 8,54     | 8,66     | 7,26               | 6,98     | 7,11     | 395,622      | 139,2187    | -2,8417                       | 5,48638E-05 | NM_003107       | SOX4     | SRY (sex determining region Y)-box 4                                 | Yes                             |
| 6,1                 | 6,09     | 5,83     | 4,44               | 4,22     | 4,8      | 64,5333      | 22,7333     | -2,8387                       | 0,000875614 | ENST00000424383 | ELFN1    | extracellular leucine-rich repeat and fibronectin type III domain co |                                 |
| 7,9                 | 8,06     | 8,07     | 6,3                | 6,63     | 6,67     | 258,1513     | 93,222      | -2,7692                       | 0,000166968 | NM_001040056    | MAPK3    | mitogen-activated protein kinase 3                                   | Yes                             |
| 6,83                | 7,36     | 7,36     | 5,46               | 5,92     | 5,82     | 147,4433     | 53,686      | -2,7464                       | 0,005922346 | ENST00000339732 | GALNTL2  | UDP-N-acetyl-alpha-D-galactosamine:polypeptide N-acetylgalact        |                                 |
| 6,74                | 7,2      | 7,12     | 5,56               | 5,86     | 5,51     | 131,0087     | 50,276      | -2,6058                       | 0,003313589 | NM_001928       | CFD      | complement factor D (adipsin)                                        |                                 |
| 6,8                 | 7,27     | 7,31     | 5,59               | 5,81     | 6,09     | 141,4853     | 57,4637     | -2,4622                       | 0,00651416  | ENST00000296130 | CLEC3B   | C-type lectin domain family 3, member B                              |                                 |
| 6,97                | 6,77     | 6,92     | 5,51               | 5,56     | 5,76     | 118,5327     | 48,9797     | -2,42                         | 0,000230226 | NM_006923       | SDF2     | stromal cell-derived factor 2                                        | Yes                             |
| 7,48                | 7,53     | 7,44     | 6,49               | 5,94     | 6,19     | 178,9983     | 74,762      | -2,3942                       | 0,000301499 | NM_015497       | TMEM87A  | transmembrane protein 87A                                            | Yes                             |
| 5,91                | 5,49     | 5,36     | 4,14               | 4,44     | 4,47     | 48,7137      | 20,4993     | -2,3764                       | 0,009248072 | NM_005144       | HR       | hairless homolog (mouse)                                             |                                 |
| 6,4                 | 6,3      | 6,6      | 4,92               | 5,47     | 5,34     | 86,7493      | 38,3673     | -2,261                        | 0,002088776 | NM_002579       | PALM     | paralemmin                                                           |                                 |
| 5,94                | 5,81     | 5,77     | 4,63               | 4,67     | 4,74     | 57,355       | 25,647      | -2,2363                       | 0,000121978 | NM_001135642    | INPP5K   | inositol polyphosphate-5-phosphatase K                               |                                 |
| 5,67                | 5,84     | 5,47     | 4,38               | 4,73     | 4,39     | 50,84        | 22,775      | -2,2323                       | 0,002579144 | NM_004548       | NDUFB10  | NADH dehydrogenase (ubiquinone) 1 beta subcomplex, 10, 22kD          | Yes                             |
| 6,05                | 6,24     | 6,53     | 4,93               | 5,35     | 5,22     | 78,084       | 36,1803     | -2,1582                       | 0,007018926 | ENST00000296861 | TNFRSF21 | tumor necrosis factor receptor superfamily, member 21                |                                 |
| 5,97                | 6,67     | 6,2      | 5,42               | 4,93     | 5,21     | 79,343       | 36,7707     | -2,1578                       | 0,025141514 | ENST00000426925 | SH3BP5   | SH3-domain binding protein 5 (BTK-associated)                        |                                 |
| 5,45                | 5,98     | 6,11     | 4,86               | 4,75     | 4,7      | 58,6343      | 27,314      | -2,1467                       | 0,01531336  | NM_002053       | GBP1     | guanylate binding protein 1, interferon-inducible                    |                                 |
| 7,74                | 8,04     | 7,64     | 6,69               | 6,73     | 6,77     | 225,482      | 106,18      | -2,1236                       | 0,003533214 | ENST00000222271 | COMP     | cartilage oligomeric matrix protein                                  |                                 |
| 5,98                | 6,29     | 5,93     | 5,03               | 4,95     | 5,01     | 67,4457      | 31,935      | -2,112                        | 0,002889349 | NM_020422       | TMEM159  | transmembrane protein 159                                            |                                 |
| 5,64                | 6,01     | 6,32     | 4,87               | 4,74     | 5,17     | 64,735       | 30,656      | -2,1117                       | 0,020040789 | NM_017680       | ASPN     | asporin                                                              |                                 |
| 8,87                | 8,41     | 8,17     | 7,52               | 7,41     | 7,4      | 365,347      | 174,1717    | -2,0976                       | 0,02349608  | NM_014424       | HSPB7    | heat shock 27kDa protein family, member 7 (cardiovascular)           |                                 |
| 6,58                | 6,73     | 6,4      | 5,59               | 5,34     | 5,58     | 95,424       | 45,5023     | -2,0971                       | 0,001779847 | BC104183        | KIAA1644 | KIAA1644                                                             |                                 |
| 5,72                | 5,35     | 5,69     | 4,15               | 4,9      | 4,47     | 48,3737      | 23,2573     | -2,0799                       | 0,008439    | ENST00000394521 | CAPS     | calcyphosine                                                         |                                 |
| 8,86                | 9,05     | 8,88     | 7,9                | 7,91     | 7,82     | 488,614      | 235,1153    | -2,0782                       | 0,000285871 | NM_001199214    | STMN2    | stathmin-like 2                                                      |                                 |
| 8,31                | 8,12     | 8,28     | 7,34               | 7,07     | 7,15     | 302,1343     | 146,1353    | -2,0675                       | 0,000440635 | NM_003588       | CUL4B    | culin 4B                                                             |                                 |
| 6,47                | 6,57     | 6,55     | 5,55               | 5,53     | 5,41     | 92,4527      | 45,1917     | -2,0458                       | 3,69008E-05 | NM_001184819    | GNL3L    | guanine nucleotide binding protein-like 3 (nucleolar)-like           |                                 |
| 8,17                | 8,17     | 8,14     | 7,22               | 7,08     | 7,09     | 286,0393     | 140,2077    | -2,0401                       | 0,000007386 | NM_002890       | RASA1    | RAS p21 protein activator (GTPase activating protein) 1              | Yes                             |
| 6,14                | 5,86     | 5,8      | 4,42               | 5,26     | 4,95     | 61,4393      | 30,212      | -2,0336                       | 0,009642088 | NR_024084       | SAP30L   | SAP30-like                                                           | Yes                             |
| 6,99                | 7,03     | 6,83     | 6,09               | 5,84     | 5,86     | 123,8593     | 61,161      | -2,0251                       | 0,000544213 | NM_001199159    | PI16     | peptidase inhibitor 16                                               |                                 |
| 7,24                | 6,82     | 7,11     | 6,15               | 5,94     | 6,05     | 134,098      | 66,2207     | -2,025                        | 0,004181626 | NM_003155       | STC1     | stanniocalcin 1                                                      |                                 |
| 7,98                | 7,97     | 7,9      | 6,86               | 7,03     | 6,91     | 247,3547     | 122,3703    | -2,0214                       | 0,00003316  | NM_015975       | TAF9B    | TAF9B RNA polymerase II, TATA box binding protein (TBP)-asso         |                                 |
| 7,35                | 7,27     | 7,22     | 6,17               | 6,41     | 6,22     | 155,5243     | 77,1943     | -2,0147                       | 0,000164812 | ENST00000368911 | CDK19    | cyclin-dependent kinase 19                                           | Yes                             |
| 8,13                | 8,19     | 8,13     | 7,24               | 7,15     | 7,09     | 284,1047     | 143,1437    | -1,9848                       | 0,000017994 | ENST00000373610 | TXLNA    | taxilin alpha                                                        |                                 |
| 7,1                 | 6,98     | 7,12     | 6,2                | 6,07     | 5,98     | 134,1757     | 67,9393     | -1,9749                       | 0,000190753 | NM_173470       | MMGT1    | membrane magnesium transporter 1                                     |                                 |
| 6,17                | 5,71     | 5,81     | 4,8                | 4,82     | 5,17     | 60,151       | 30,702      | -1,9592                       | 0,011044444 | NM_144653       | NACC2    | NACC family member 2, BEN and BTB (POZ) domain containing            | Yes                             |

| Pre-miR-Ctrl (Log2) |          |          | Pre-miR-132 (Log2) |          |          | Average      |             | Fold Change (miR-132 vs Ctrl) | p-value     | Gene Assignment |           |                                                                    | Predicted miR-132 binding sites |
|---------------------|----------|----------|--------------------|----------|----------|--------------|-------------|-------------------------------|-------------|-----------------|-----------|--------------------------------------------------------------------|---------------------------------|
| Sample 1            | Sample 2 | Sample 3 | Sample 1           | Sample 2 | Sample 3 | Pre-miR-Ctrl | Pre-miR-132 |                               |             | Public id       | Symbol    | Name                                                               |                                 |
| 8,65                | 8,72     | 8,64     | 7,84               | 7,61     | 7,65     | 407,4393     | 208,447     | -1,9546                       | 9,62638E-05 | NM_018490       | LGR4      | leucine-rich repeat containing G protein-coupled receptor 4        |                                 |
| 6,58                | 6,76     | 6,61     | 5,72               | 5,61     | 5,81     | 100,578      | 52,551      | -1,9139                       | 0,000424867 | NM_001031683    | IFIT3     | interferon-induced protein with tetratricopeptide repeats 3        |                                 |
| 5,63                | 5,88     | 5,68     | 4,65               | 4,85     | 4,89     | 53,2273      | 27,866      | -1,9101                       | 0,001370358 | NM_080881       | DBN1      | drebrin 1                                                          |                                 |
| 6,86                | 6,97     | 6,91     | 5,95               | 6,03     | 5,96     | 120,5957     | 63,1383     | -1,91                         | 3,74811E-05 | NR_049789       | PLEKHB2   | pleckstrin homology domain containing, family B (evectins) memb    |                                 |
| 7,05                | 7,22     | 7,4      | 6,25               | 6,41     | 6,23     | 150,1657     | 78,7353     | -1,9072                       | 0,002883503 | NM_005100       | AKAP12    | A kinase (PRKA) anchor protein 12                                  |                                 |
| 5,35                | 5,09     | 5,31     | 4,63               | 4,04     | 4,27     | 38,1723      | 20,168      | -1,8927                       | 0,004941776 | ENST00000254801 | IGJ       | immunoglobulin J polypeptide, linker protein for immunoglobulin a  |                                 |
| 5,77                | 5,34     | 5,75     | 4,91               | 4,77     | 4,42     | 49,63        | 26,252      | -1,8905                       | 0,011094482 | NM_198472       | C10orf125 | chromosome 10 open reading frame 125                               |                                 |
| 6,6                 | 6,41     | 6,85     | 5,8                | 5,86     | 5,45     | 99,134       | 52,503      | -1,8882                       | 0,009161725 | NR_003246       | GOLGA6L5  | golgin A6 family-like 5 (pseudogene)                               |                                 |
| 5,76                | 5,93     | 6,1      | 4,9                | 4,98     | 5,17     | 61,2517      | 32,4727     | -1,8863                       | 0,003185213 | NM_001033723    | ZNF704    | zinc finger protein 704                                            |                                 |
| 8,48                | 8,7      | 8,6      | 7,6                | 7,74     | 7,7      | 386,9833     | 205,244     | -1,8855                       | 0,000538109 | NM_058229       | FBXO32    | F-box protein 32                                                   |                                 |
| 8,07                | 8,26     | 8,17     | 7,34               | 7,24     | 7,18     | 287,7657     | 152,731     | -1,8841                       | 0,000355181 | ENST00000300574 | CRK       | v-crk sarcoma virus CT10 oncogene homolog (avian)                  | Yes                             |
| 5,85                | 5,48     | 5,8      | 4,79               | 5,01     | 4,59     | 52,6757      | 27,9907     | -1,8819                       | 0,006264542 | NM_014586       | HUNK      | hormonally up-regulated Neu-associated kinase                      |                                 |
| 7,31                | 7,23     | 7,17     | 6,26               | 6,37     | 6,35     | 150,9377     | 80,3073     | -1,8795                       | 0,00010918  | NM_203351       | MAP3K3    | mitogen-activated protein kinase kinase kinase 3                   | Yes                             |
| 6,99                | 7,04     | 7,19     | 6,18               | 6,29     | 6,02     | 134,911      | 71,8823     | -1,8768                       | 0,000792784 | NM_005502       | ABCA1     | ATP-binding cassette, sub-family A (ABC1), member 1                |                                 |
| 6,46                | 6,38     | 6,57     | 5,59               | 5,34     | 5,75     | 88,777       | 47,4963     | -1,8691                       | 0,001309557 | ENST00000560869 | TNFAIP2   | tumor necrosis factor, alpha-induced protein 2                     |                                 |
| 8,32                | 8,24     | 8,22     | 7,18               | 7,37     | 7,57     | 306,693      | 166,8163    | -1,8385                       | 0,000657671 | ENST00000412716 | DAZAP2    | DAZ associated protein 2                                           | Yes                             |
| 7,25                | 7,31     | 7,27     | 6,47               | 6,57     | 6,12     | 155,0817     | 84,4027     | -1,8374                       | 0,000856024 | NM_003632       | CNTNAP1   | contactin associated protein 1                                     |                                 |
| 6,62                | 6,79     | 6,43     | 5,85               | 5,7      | 5,69     | 98,4147      | 53,763      | -1,8305                       | 0,003658216 | NM_033339       | CASP7     | caspase 7, apoptosis-related cysteine peptidase                    | Yes                             |
| 7,35                | 7,18     | 7,27     | 6,42               | 6,45     | 6,32     | 154,1653     | 84,3157     | -1,8284                       | 0,000255953 | NM_006832       | FERMT2    | fermitin family member 2                                           |                                 |
| 5,85                | 6,31     | 5,73     | 5                  | 5,3      | 5,03     | 63,3657      | 34,6897     | -1,8266                       | 0,027284687 | NM_024825       | PODNL1    | podocan-like 1                                                     |                                 |
| 6,62                | 6,88     | 6,79     | 5,79               | 5,95     | 5,96     | 108,935      | 59,8        | -1,8217                       | 0,001288984 | NM_001242532    | MFSD11    | major facilitator superfamily domain containing 11                 | Yes                             |
| 5,62                | 5,99     | 6,05     | 4,68               | 5,04     | 5,32     | 59,665       | 32,827      | -1,8176                       | 0,01621756  | ENST00000443533 | DDAH2     | dimethylarginine dimethylaminohydrolase 2                          |                                 |
| 8,42                | 8,62     | 8,52     | 7,56               | 7,69     | 7,73     | 367,6807     | 202,504     | -1,8157                       | 0,000537622 | NM_138420       | AHNAK2    | AHNAK nucleoprotein 2                                              |                                 |
| 8,1                 | 8,45     | 8,29     | 7,39               | 7,31     | 7,57     | 312,3587     | 172,144     | -1,8145                       | 0,004061307 | NM_133373       | PLCD3     | phospholipase C, delta 3                                           |                                 |
| 7,26                | 7,42     | 7,37     | 6,65               | 6,35     | 6,46     | 163,3177     | 90,0113     | -1,8144                       | 0,00066536  | NM_003786       | ABCC3     | ATP-binding cassette, sub-family C (CFTR/MRP), member 3            |                                 |
| 5,16                | 5,32     | 5,41     | 4,47               | 4,26     | 4,58     | 39,406       | 21,7467     | -1,812                        | 0,001851113 | NM_015983       | UBE2D4    | ubiquitin-conjugating enzyme E2D 4 (putative)                      |                                 |
| 9,53                | 9,52     | 9,59     | 8,69               | 8,66     | 8,73     | 748,0543     | 414,038     | -1,8067                       | 1,28691E-05 | NM_001017424    | KCNK2     | potassium channel, subfamily K, member 2                           | Yes                             |
| 6,88                | 6,49     | 6,87     | 6,26               | 6        | 5,33     | 108,2127     | 60,2877     | -1,7949                       | 0,027127837 | NM_018427       | RRN3      | RRN3 RNA polymerase I transcription factor homolog (S. cerevisiae) |                                 |
| 6,36                | 6,66     | 6,35     | 5,73               | 5,71     | 5,41     | 88,2787      | 49,3133     | -1,7902                       | 0,0058512   | ENST00000544228 | MTMR1     | myotubularin related protein 1                                     |                                 |
| 6,25                | 6,39     | 6,7      | 5,47               | 5,89     | 5,47     | 87,9807      | 49,3167     | -1,784                        | 0,016247056 | NM_198827       | GPR133    | G protein-coupled receptor 133                                     |                                 |
| 6,8                 | 7,05     | 7,17     | 5,91               | 6,3      | 6,3      | 129,317      | 72,5717     | -1,7819                       | 0,007582937 | ENST00000405308 | MDK       | midkine (neurite growth-promoting factor 2)                        |                                 |
| 5,75                | 5,94     | 6,02     | 4,89               | 5,37     | 4,92     | 60,0343      | 33,76       | -1,7783                       | 0,00633843  | ENST00000422725 | C1orf233  | chromosome 1 open reading frame 233                                |                                 |
| 9,56                | 9,54     | 9,47     | 8,46               | 8,79     | 8,81     | 736,1453     | 414,5347    | -1,7758                       | 0,000709941 | NM_001136191    | KANK2     | KN motif and ankyrin repeat domains 2                              |                                 |
| 6,41                | 6,11     | 6,34     | 5,35               | 5,6      | 5,46     | 78,3717      | 44,4353     | -1,7637                       | 0,003034201 | NM_173505       | ANKRD29   | ankyrin repeat domain 29                                           | Yes                             |
| 7,79                | 7,83     | 7,81     | 6,97               | 7,01     | 7,03     | 224,4257     | 128,3153    | -1,749                        | 2,25208E-06 | ENST00000322213 | SMC1A     | structural maintenance of chromosomes 1A                           |                                 |
| 7,59                | 7,69     | 7,38     | 6,81               | 6,61     | 6,85     | 188,5813     | 108,4157    | -1,7394                       | 0,003422491 | NM_016097       | IER3IP1   | immediate early response 3 interacting protein 1                   |                                 |
| 7,61                | 7,36     | 7,49     | 6,72               | 6,74     | 6,62     | 179,803      | 103,557     | -1,7363                       | 0,001231308 | NM_001955       | EDN1      | endothelin 1                                                       |                                 |
| 5,73                | 5,91     | 6,06     | 5,15               | 5,14     | 5,04     | 59,9743      | 34,5557     | -1,7356                       | 0,003217345 | NM_152345       | ANKRD13B  | ankyrin repeat domain 13B                                          |                                 |
| 7,57                | 7,44     | 7,44     | 6,65               | 6,74     | 6,68     | 179,103      | 103,285     | -1,7341                       | 0,00019508  | NM_025250       | TTYH3     | tweety homolog 3 (Drosophila)                                      |                                 |
| 8,12                | 8,24     | 8,34     | 7,33               | 7,55     | 7,44     | 301,524      | 173,982     | -1,7331                       | 0,001128768 | NM_001204502    | FLT3LG    | fms-related tyrosine kinase 3 ligand                               |                                 |

| Pre-miR-Ctrl (Log2) |          |          | Pre-miR-132 (Log2) |          |          | Average      |             | Fold Change (miR-132 vs Ctrl) | p-value     | Gene Assignment |              |                                                                       | Predicted miR-132 binding sites |
|---------------------|----------|----------|--------------------|----------|----------|--------------|-------------|-------------------------------|-------------|-----------------|--------------|-----------------------------------------------------------------------|---------------------------------|
| Sample 1            | Sample 2 | Sample 3 | Sample 1           | Sample 2 | Sample 3 | Pre-miR-Ctrl | Pre-miR-132 |                               |             | Public id       | Symbol       | Name                                                                  |                                 |
| 7,43                | 7,59     | 7,52     | 6,71               | 6,69     | 6,77     | 182,888      | 105,6927    | -1,7304                       | 0,000226029 | NM_016626       | MEX3C        | mex-3 homolog C (C. elegans)                                          |                                 |
| 5,77                | 5,69     | 5,98     | 4,81               | 5,11     | 5,14     | 56,4377      | 32,6157     | -1,7304                       | 0,004521578 | NM_001164446    | C6orf132     | chromosome 6 open reading frame 132                                   |                                 |
| 5,51                | 5,88     | 5,97     | 4,88               | 5,06     | 5,08     | 55,715       | 32,21       | -1,7297                       | 0,011915307 | NM_001204286    | MUC1         | mucin 1, cell surface associated                                      |                                 |
| 5,73                | 5,56     | 5,73     | 4,91               | 5,08     | 4,64     | 51,1097      | 29,6077     | -1,7262                       | 0,002680139 | NM_058164       | OLFM2        | olfactomedin 2                                                        |                                 |
| 7,97                | 8,26     | 8,22     | 7,31               | 7,31     | 7,48     | 285,153      | 165,2977    | -1,7251                       | 0,00298215  | NM_003004       | SECTM1       | secreted and transmembrane 1                                          |                                 |
| 8,84                | 8,82     | 8,85     | 8,16               | 8,06     | 7,93     | 457,2123     | 265,5907    | -1,7215                       | 0,000105636 | NM_001042537    | SLC9A6       | solute carrier family 9, subfamily A (NHE6, cation proton antiporter) |                                 |
| 6,39                | 6,05     | 6,34     | 5,44               | 5,59     | 5,42     | 77,0433      | 44,7977     | -1,7198                       | 0,004851082 | NM_001161766    | AHCY         | adenosylhomocysteinase                                                | Yes                             |
| 6,39                | 6,28     | 6,35     | 5,39               | 5,71     | 5,56     | 81,0483      | 47,152      | -1,7189                       | 0,000637516 | ENST00000259392 | SLC31A2      | solute carrier family 31 (copper transporters), member 2              |                                 |
| 8,01                | 7,98     | 7,72     | 7,04               | 7,17     | 7,18     | 240,3653     | 140,205     | -1,7144                       | 0,002922825 | NM_004750       | CRLF1        | cytokine receptor-like factor 1                                       |                                 |
| 5,58                | 6,03     | 6,02     | 4,75               | 5,02     | 5,48     | 59,3577      | 34,6627     | -1,7124                       | 0,03379438  | ENST00000443533 | DDAH2        | dimethylarginine dimethylaminohydrolase 2                             |                                 |
| 6,8                 | 6,5      | 6,89     | 5,89               | 6,05     | 5,95     | 106,8477     | 62,4597     | -1,7107                       | 0,006884507 | NM_004102       | FABP3        | fatty acid binding protein 3, muscle and heart (mammary-derived)      |                                 |
| 6,23                | 6,13     | 6,46     | 5,36               | 5,6      | 5,55     | 77,7103      | 45,4747     | -1,7089                       | 0,005183594 | NM_022783       | DEPTOR       | DEP domain containing MTOR-interacting protein                        |                                 |
| 6,27                | 6,12     | 6,25     | 5,41               | 5,21     | 5,67     | 74,2773      | 43,482      | -1,7082                       | 0,002787044 | NM_006598       | SLC12A7      | solute carrier family 12 (potassium/chloride transporters), member 7  |                                 |
| 7,57                | 7,61     | 7,64     | 6,65               | 6,99     | 6,85     | 194,9487     | 114,301     | -1,7056                       | 0,000597265 | NM_138383       | MTSS1L       | metastasis suppressor 1-like                                          |                                 |
| 6,49                | 6,16     | 6,06     | 5,34               | 5,35     | 5,73     | 76,036       | 44,7887     | -1,6977                       | 0,018832336 | NM_006989       | RASA4        | RAS p21 protein activator 4                                           |                                 |
| 5,22                | 5,12     | 5,3      | 4,33               | 4,72     | 4,27     | 37,148       | 21,92       | -1,6947                       | 0,004236818 | NM_052880       | PIK3IP1      | phosphoinositide-3-kinase interacting protein 1                       |                                 |
| 5,61                | 5,85     | 5,73     | 4,9                | 4,91     | 5,1      | 53,1987      | 31,4063     | -1,6939                       | 0,001754079 | NM_017449       | EPHB2        | EPH receptor B2                                                       |                                 |
| 5,99                | 6,32     | 5,92     | 5,26               | 5,66     | 4,98     | 67,9997      | 40,147      | -1,6938                       | 0,027239791 | NM_032515       | BOK          | BCL2-related ovarian killer                                           |                                 |
| 7,53                | 7,36     | 7,32     | 6,73               | 6,45     | 6,74     | 169,6293     | 100,157     | -1,6936                       | 0,002253156 | NM_134268       | CYGB         | cytoglobin                                                            |                                 |
| 7,73                | 7,72     | 7,72     | 7,03               | 6,78     | 7,08     | 211,328      | 125,2947    | -1,6866                       | 0,000389617 | ENST00000258198 | DYNC1LI2     | dynein, cytoplasmic 1, light intermediate chain 2                     |                                 |
| 5,83                | 5,95     | 5,78     | 4,69               | 5,44     | 5,09     | 57,8847      | 34,428      | -1,6813                       | 0,012840257 | NM_002015       | FOXO1        | forkhead box O1                                                       |                                 |
| 6,29                | 6,27     | 6,62     | 5,54               | 5,76     | 5,66     | 84,5937      | 50,4273     | -1,6775                       | 0,009164714 | ENST00000240123 | SORBS3       | sorbin and SH3 domain containing 3                                    |                                 |
| 8,22                | 8,45     | 8,4      | 7,34               | 7,8      | 7,67     | 328,5573     | 196,1783    | -1,6748                       | 0,005094719 | NM_005512       | LRRC32       | leucine rich repeat containing 32                                     |                                 |
| 6,62                | 6,49     | 6,68     | 5,8                | 5,88     | 5,9      | 96,927       | 58,107      | -1,6681                       | 0,000581778 | NM_014992       | DAAM1        | dishevelled associated activator of morphogenesis 1                   |                                 |
| 7,55                | 7,76     | 7,99     | 6,94               | 7        | 7,18     | 219,4673     | 131,9317    | -1,6635                       | 0,012885449 | NM_001077195    | ZNF436       | zinc finger protein 436                                               |                                 |
| 7,43                | 7,23     | 7,42     | 6,73               | 6,54     | 6,61     | 164,608      | 98,9627     | -1,6633                       | 0,001321967 | ENST00000366862 | FBXO28       | F-box protein 28                                                      | Yes                             |
| 8,69                | 8,6      | 8,69     | 7,96               | 7,97     | 7,85     | 404,675      | 243,484     | -1,662                        | 0,000105139 | NM_015137       | EFR3A        | EFR3 homolog A (S. cerevisiae)                                        |                                 |
| 6,33                | 6,31     | 6,3      | 5,51               | 5,49     | 5,73     | 79,5277      | 47,8627     | -1,6616                       | 0,000284384 | NM_017857       | SSH3         | slingshot homolog 3 (Drosophila)                                      |                                 |
| 6,87                | 6,85     | 6,63     | 6,3                | 6,03     | 5,79     | 110,458      | 66,4893     | -1,6613                       | 0,007776731 | NM_022900       | CASD1        | CAS1 domain containing 1                                              |                                 |
| 8,54                | 8,71     | 8,56     | 7,73               | 7,97     | 7,92     | 389,4653     | 235,0763    | -1,6568                       | 0,001192754 | NM_007173       | PRSS23       | protease, serine, 23                                                  |                                 |
| 6,64                | 6,51     | 6,42     | 5,99               | 5,7      | 5,69     | 92,1663      | 55,7223     | -1,654                        | 0,003022555 | ENST00000494426 | CLIC3        | chloride intracellular channel 3                                      |                                 |
| 5,7                 | 6,02     | 6,09     | 5,38               | 5,23     | 5,04     | 61,6657      | 37,358      | -1,6507                       | 0,011795758 | ENST00000242576 | UNG          | uracil-DNA glycosylase                                                |                                 |
| 8,8                 | 8,86     | 8,89     | 8,05               | 8,03     | 8,29     | 461,595      | 279,801     | -1,6497                       | 0,000619355 | NR_028349       | LOC100287834 | uncharacterized LOC100287834                                          |                                 |
| 5,32                | 4,8      | 5,02     | 4,24               | 4,57     | 4,18     | 33,4173      | 20,258      | -1,6496                       | 0,028814099 | XR_108881       | LOC100506966 | uncharacterized LOC100506966                                          |                                 |
| 7,47                | 7,3      | 7,28     | 6,62               | 6,77     | 6,49     | 163,4323     | 99,127      | -1,6487                       | 0,00195809  | NM_003270       | TSPAN6       | tetraspanin 6                                                         |                                 |
| 7,48                | 7,51     | 7,36     | 6,7                | 6,76     | 6,73     | 175,028      | 106,168     | -1,6486                       | 0,000256337 | ENST00000331373 | SGK196       | protein kinase-like protein SgK196                                    |                                 |
| 7,75                | 7,93     | 7,66     | 6,95               | 7,12     | 7,12     | 220,465      | 133,948     | -1,6459                       | 0,00290603  | NM_015916       | CALHM2       | calcium homeostasis modulator 2                                       |                                 |
| 6,42                | 6,71     | 6,76     | 6,13               | 5,9      | 5,7      | 99,567       | 60,5777     | -1,6436                       | 0,011319789 | NM_018295       | TMEM140      | transmembrane protein 140                                             |                                 |
| 8,6                 | 8,54     | 8,39     | 7,89               | 7,78     | 7,72     | 365,2337     | 222,613     | -1,6407                       | 0,001203881 | NM_031476       | CRISPLD2     | cysteine-rich secretory protein LCCL domain containing 2              |                                 |
| 6,7                 | 6,31     | 6,57     | 5,88               | 5,72     | 5,86     | 92,773       | 56,561      | -1,6402                       | 0,008288815 | NM_001198670    | TMEM136      | transmembrane protein 136                                             | Yes                             |



| Pre-miR-Ctrl (Log2) |          |          | Pre-miR-132 (Log2) |          |          | Average      |             | Fold Change (miR-132 vs Ctrl) | p-value     | Gene Assignment |              |                                                                            | Predicted miR-132 binding sites |
|---------------------|----------|----------|--------------------|----------|----------|--------------|-------------|-------------------------------|-------------|-----------------|--------------|----------------------------------------------------------------------------|---------------------------------|
| Sample 1            | Sample 2 | Sample 3 | Sample 1           | Sample 2 | Sample 3 | Pre-miR-Ctrl | Pre-miR-132 |                               |             | Public id       | Symbol       | Name                                                                       |                                 |
| 8,29                | 8,22     | 8,46     | 7,74               | 7,46     | 7,64     | 321,1023     | 196,4393    | -1,6346                       | 0,003068937 | ENST00000522510 | OSR2         | odd-skipped related 2 (Drosophila)                                         |                                 |
| 5,26                | 4,62     | 5,19     | 4,44               | 4,29     | 4,3      | 33,1377      | 20,322      | -1,6306                       | 0,042451466 | ENST00000560415 | LOC100505573 | uncharacterized LOC100505573                                               |                                 |
| 10,33               | 10,38    | 10,41    | 9,72               | 9,63     | 9,66     | 1326,7767    | 814,904     | -1,6281                       | 4,00436E-05 | NM_016441       | CRIM1        | cysteine rich transmembrane BMP regulator 1 (chordin-like)                 |                                 |
| 5,68                | 5,95     | 6,03     | 5,29               | 5,32     | 4,95     | 59,4777      | 36,6603     | -1,6224                       | 0,011185782 | ENST00000379705 | TRPC4        | transient receptor potential cation channel, subfamily C, member 4         |                                 |
| 7,73                | 7,63     | 7,8      | 7,06               | 7,04     | 6,97     | 211,085      | 130,1337    | -1,6221                       | 0,000435799 | NM_000321       | RB1          | retinoblastoma 1                                                           | Yes                             |
| 7,89                | 8,14     | 8,09     | 7,23               | 7,41     | 7,4      | 263,9247     | 163,0307    | -1,6189                       | 0,002606501 | ENST00000374316 | ITPR3        | inositol 1,4,5-trisphosphate receptor, type 3                              |                                 |
| 5,51                | 5,1      | 5,48     | 4,79               | 4,76     | 4,47     | 41,4997      | 25,641      | -1,6185                       | 0,016777789 | NM_004636       | SEMA3B       | sema domain, immunoglobulin domain (Ig), short basic domain, sema          |                                 |
| 6,38                | 6,32     | 6,06     | 5,48               | 5,52     | 5,69     | 76,6323      | 47,3813     | -1,6174                       | 0,005982403 | ENST00000272233 | RHOB         | ras homolog family member B                                                |                                 |
| 5,03                | 5,51     | 5,38     | 4,25               | 5        | 4,53     | 39,9617      | 24,71       | -1,6172                       | 0,047804044 | NM_015379       | BRI3         | brain protein I3                                                           | Yes                             |
| 7,38                | 7,18     | 7,28     | 6,62               | 6,58     | 6,57     | 155,666      | 96,3467     | -1,6157                       | 0,000713392 | ENST00000489418 | SLBP         | stem-loop binding protein                                                  | Yes                             |
| 5,89                | 5,5      | 5,67     | 4,77               | 5,19     | 5,02     | 51,8237      | 32,0783     | -1,6155                       | 0,015474237 | NM_014272       | ADAMTS7      | ADAM metalloproteinase with thrombospondin type 1 motif, 7                 |                                 |
| 6,07                | 5,76     | 5,8      | 5,15               | 5,27     | 5,16     | 59,0297      | 36,615      | -1,6122                       | 0,006025569 | NM_005516       | HLA-E        | major histocompatibility complex, class I, E                               |                                 |
| 8,87                | 9,09     | 9,02     | 8,38               | 8,22     | 8,32     | 510,6623     | 316,963     | -1,6111                       | 0,001457497 | ENST00000309446 | KLF7         | Kruppel-like factor 7 (ubiquitous)                                         | Yes                             |
| 9,15                | 9,15     | 9,19     | 8,48               | 8,47     | 8,48     | 573,4237     | 356,232     | -1,6097                       | 2,26104E-06 | NM_020428       | SLC44A2      | solute carrier family 44, member 2                                         |                                 |
| 7,89                | 7,81     | 7,88     | 7,1                | 7,18     | 7,25     | 232,3953     | 144,805     | -1,6049                       | 0,000121174 | ENST00000535512 | PLSCR3       | phospholipid scramblase 3                                                  |                                 |
| 7,84                | 7,4      | 7,67     | 7,04               | 7,01     | 6,84     | 200,56       | 125,0173    | -1,6043                       | 0,014352801 | NM_005338       | HIP1         | huntingtin interacting protein 1                                           |                                 |
| 5,48                | 5,83     | 5,71     | 4,94               | 4,93     | 5,12     | 51,288       | 31,9853     | -1,6035                       | 0,007348885 | NM_001166034    | SBSN         | suprabasin                                                                 |                                 |
| 9,19                | 9,28     | 9,31     | 8,35               | 8,68     | 8,69     | 613,4897     | 383,1457    | -1,6012                       | 0,002030317 | NM_001199570    | CLIP3        | CAP-GLY domain containing linker protein 3                                 |                                 |
| 8,52                | 8,46     | 8,47     | 7,61               | 7,89     | 7,9      | 357,94       | 223,808     | -1,5993                       | 0,00085748  | NM_032271       | TRAF7        | TNF receptor-associated factor 7, E3 ubiquitin protein ligase              |                                 |
| 6,94                | 6,73     | 6,92     | 6,11               | 6,32     | 6,13     | 116,678      | 72,9997     | -1,5983                       | 0,00229383  | NM_014737       | RASSF2       | Ras association (RalGDS/AF-6) domain family member 2                       |                                 |
| 8,48                | 8,58     | 8,6      | 7,94               | 7,82     | 7,88     | 375,9193     | 235,704     | -1,5949                       | 0,000226696 | NM_015138       | RTF1         | Rtf1, Paf1/RNA polymerase II complex component, homolog (S. cerevisiae)    |                                 |
| 7,61                | 7,73     | 7,74     | 6,69               | 7,04     | 7,28     | 207,15       | 130,0887    | -1,5924                       | 0,008916186 | NM_000565       | IL6R         | interleukin 6 receptor                                                     |                                 |
| 5,83                | 5,8      | 5,79     | 5,37               | 4,93     | 5,08     | 55,977       | 35,2213     | -1,5893                       | 0,00308094  | NM_001483       | GBAS         | glioblastoma amplified sequence                                            | Yes                             |
| 7,71                | 7,44     | 7,6      | 6,9                | 6,96     | 6,9      | 192,3467     | 121,1187    | -1,5881                       | 0,002454263 | ENST00000519389 | HEPH         | hephaestin                                                                 |                                 |
| 7,25                | 7,28     | 7,18     | 6,45               | 6,55     | 6,7      | 150,8817     | 95,032      | -1,5877                       | 0,000616392 | NM_001256658    | TEAD2        | TEA domain family member 2                                                 |                                 |
| 6,65                | 6,57     | 6,68     | 5,82               | 6,1      | 5,97     | 99,3247      | 62,59       | -1,5869                       | 0,000900182 | NM_198236       | ARHGEF11     | Rho guanine nucleotide exchange factor (GEF) 11                            | Yes                             |
| 7,51                | 7,62     | 7,84     | 6,92               | 6,92     | 7,14     | 202,708      | 127,7447    | -1,5868                       | 0,008167056 | NM_021962       | ABR          | active BCR-related                                                         |                                 |
| 6,59                | 6,67     | 6,29     | 5,76               | 5,97     | 5,85     | 92,138       | 58,185      | -1,5835                       | 0,010784461 | NM_006989       | RASA4        | RAS p21 protein activator 4                                                |                                 |
| 10,09               | 10,22    | 10,18    | 9,45               | 9,57     | 9,49     | 1147,5583    | 726,1883    | -1,5802                       | 0,000278904 | NM_007038       | ADAMTS5      | ADAM metalloproteinase with thrombospondin type 1 motif, 5                 |                                 |
| 7,81                | 7,96     | 7,98     | 7,31               | 7,17     | 7,3      | 241,9623     | 153,4253    | -1,5771                       | 0,000903757 | NM_017583       | TRIM44       | tripartite motif containing 44                                             | Yes                             |
| 6,72                | 6,9      | 6,71     | 6,21               | 6,21     | 5,93     | 109,8463     | 69,675      | -1,5766                       | 0,003436392 | NM_005388       | PDCL         | phosducin-like                                                             |                                 |
| 6,35                | 6,29     | 6,29     | 5,74               | 5,5      | 5,71     | 79,3567      | 50,349      | -1,5761                       | 0,000487003 | NM_014722       | FAM65B       | family with sequence similarity 65, member B                               |                                 |
| 6,81                | 6,9      | 6,69     | 6,31               | 5,98     | 6,13     | 111,628      | 70,8317     | -1,576                        | 0,003542721 | NM_022765       | MICAL1       | microtubule associated monooxygenase, calponin and LIM domain containing 1 |                                 |
| 7,39                | 7,19     | 7,07     | 6,59               | 6,75     | 6,33     | 149,3707     | 94,8067     | -1,5755                       | 0,012212617 | NM_020214       | PARP6        | poly (ADP-ribose) polymerase family, member 6                              |                                 |
| 6,72                | 6,25     | 6,72     | 5,84               | 5,82     | 6,1      | 95,6497      | 60,7897     | -1,5735                       | 0,029580372 | NM_022827       | SPATA20      | spermatogenesis associated 20                                              |                                 |
| 6,1                 | 6,52     | 6,39     | 5,57               | 5,84     | 5,66     | 81,4107      | 51,7833     | -1,5721                       | 0,016010414 | ENST00000262366 | GLIS2        | GLIS family zinc finger 2                                                  |                                 |
| 7,79                | 7,78     | 7,94     | 7,15               | 7,02     | 7,37     | 228,8957     | 145,7443    | -1,5705                       | 0,003410986 | NM_001130145    | YAP1         | Yes-associated protein 1                                                   |                                 |
| 5,12                | 5,16     | 5,2      | 4,46               | 4,32     | 4,72     | 35,7623      | 22,779      | -1,57                         | 0,002730671 | NR_026052       | MGC2752      | CENPB DNA-binding domains containing 1 pseudogene                          |                                 |
| 6,01                | 5,76     | 5,98     | 5,26               | 5,17     | 5,38     | 60,5853      | 38,6547     | -1,5673                       | 0,003716408 | NM_018367       | ACER3        | alkaline ceramidase 3                                                      |                                 |
| 5,56                | 5,44     | 5,34     | 4,85               | 4,5      | 5,01     | 43,6973      | 27,8967     | -1,5664                       | 0,009779436 | NM_001080509    | TSPAN11      | tetraspanin 11                                                             |                                 |

| Pre-miR-Ctrl (Log2) |          |          | Pre-miR-132 (Log2) |          |          | Average      |             | Fold Change (miR-132 vs Ctrl) | p-value      | Gene Assignment |              |                                                                           | Predicted miR-132 binding sites |
|---------------------|----------|----------|--------------------|----------|----------|--------------|-------------|-------------------------------|--------------|-----------------|--------------|---------------------------------------------------------------------------|---------------------------------|
| Sample 1            | Sample 2 | Sample 3 | Sample 1           | Sample 2 | Sample 3 | Pre-miR-Ctrl | Pre-miR-132 |                               |              | Public id       | Symbol       | Name                                                                      |                                 |
| 9,44                | 9,38     | 9,37     | 8,69               | 8,85     | 8,71     | 674,1843     | 431,069     | -1,564                        | 0,000190207  | ENST00000356698 | RSPO3        | R-spondin 3                                                               |                                 |
| 6,4                 | 6,69     | 6,75     | 5,78               | 6,04     | 6,09     | 98,4447      | 62,9557     | -1,5637                       | 0,012310873  | ENST00000374332 | MAN1C1       | mannosidase, alpha, class 1C, member 1                                    |                                 |
| 5,81                | 5,65     | 5,9      | 5,12               | 5,25     | 5,06     | 55,3433      | 35,3967     | -1,5635                       | 0,002995381  | NM_004938       | DAPK1        | death-associated protein kinase 1                                         |                                 |
| 7,14                | 7,57     | 7,55     | 6,87               | 6,57     | 6,91     | 172,822      | 110,7463    | -1,5605                       | 0,025056565  | NM_030641       | APOL6        | apolipoprotein L, 6                                                       |                                 |
| 9,86                | 9,96     | 9,91     | 9,23               | 9,27     | 9,31     | 962,4567     | 617,5317    | -1,5586                       | 9,06343E-05  | ENST00000322088 | PPP2R1A      | protein phosphatase 2, regulatory subunit A, alpha                        |                                 |
| 7,14                | 7,19     | 7,17     | 6,31               | 6,48     | 6,76     | 143,6897     | 92,3293     | -1,5563                       | 0,004024169  | NM_004756       | NUMBL        | numb homolog (Drosophila)-like                                            |                                 |
| 6,8                 | 6,57     | 6,76     | 6,12               | 6        | 6,11     | 104,941      | 67,5407     | -1,5537                       | 0,002197388  | NR_033426       | ACAD9        | acyl-CoA dehydrogenase family, member 9                                   | Yes                             |
| 8,23                | 8,07     | 8,3      | 7,72               | 7,46     | 7,51     | 294,7153     | 189,7287    | -1,5534                       | 0,003787007  | NM_022977       | ACSL4        | acyl-CoA synthetase long-chain family member 4                            |                                 |
| 5,37                | 5,96     | 5,53     | 4,99               | 4,97     | 5,06     | 49,937       | 32,1597     | -1,5528                       | 0,048688345  | NM_002198       | IRF1         | interferon regulatory factor 1                                            |                                 |
| 5,24                | 5,45     | 5,17     | 4,37               | 4,58     | 4,96     | 39,169       | 25,2403     | -1,5518                       | 0,022737151  | NM_016084       | RASD1        | RAS, dexamethasone-induced 1                                              |                                 |
| 6,05                | 6,36     | 6,15     | 5,5                | 5,51     | 5,66     | 73,136       | 47,1293     | -1,5518                       | 0,00655832   | NM_002254       | KIF3C        | kinesin family member 3C                                                  |                                 |
| 6,72                | 6,4      | 6,58     | 5,93               | 5,95     | 5,94     | 95,1797      | 61,394      | -1,5503                       | 0,005084371  | NM_001083112    | GPD2         | glycerol-3-phosphate dehydrogenase 2 (mitochondrial)                      |                                 |
| 6,85                | 6,88     | 6,53     | 6,01               | 6,05     | 6,31     | 108,5183     | 70,0143     | -1,5499                       | 0,014621057  | NM_018110       | DOK4         | docking protein 4                                                         |                                 |
| 7,2                 | 7,43     | 7,15     | 6,48               | 6,51     | 6,88     | 153,8347     | 99,3957     | -1,5477                       | 0,014460684  | ENST00000396593 | CARHSP1      | calcium regulated heat stable protein 1, 24kDa                            |                                 |
| 5,72                | 5,58     | 5,71     | 5,03               | 5,12     | 4,97     | 50,9637      | 32,9297     | -1,5477                       | 0,000632805  | NR_024071       | PLCD1        | phospholipase C, delta 1                                                  |                                 |
| 6,04                | 6,26     | 6,3      | 5,58               | 5,66     | 5,48     | 73,7437      | 47,6767     | -1,5467                       | 0,003969277  | NM_002942       | ROBO2        | roundabout, axon guidance receptor, homolog 2 (Drosophila)                |                                 |
| 8,37                | 8,5      | 8,49     | 7,85               | 7,79     | 7,84     | 350,8063     | 227,056     | -1,545                        | 0,000287964  | NM_001008211    | OPTN         | optineurin                                                                |                                 |
| 7,25                | 7,35     | 7,38     | 6,83               | 6,6      | 6,67     | 160,645      | 104,2023    | -1,5417                       | 0,001026463  | NM_012320       | PLA2G15      | phospholipase A2, group XV                                                |                                 |
| 5,4                 | 5,16     | 5,73     | 4,6                | 4,92     | 4,93     | 43,6843      | 28,3363     | -1,5416                       | 0,048048189  | XR_111050       | LOC100509635 | uncharacterized LOC100509635                                              |                                 |
| 9,35                | 9,13     | 9,12     | 8,61               | 8,59     | 8,54     | 589,7537     | 382,7607    | -1,5408                       | 0,002911043  | NM_018222       | PARVA        | parvin, alpha                                                             |                                 |
| 5,87                | 5,75     | 5,6      | 5,18               | 4,89     | 5,27     | 53,6017      | 34,8297     | -1,539                        | 0,008826058  | ENST00000450736 | SLC16A5      | solute carrier family 16, member 5 (monocarboxylic acid transporter)      |                                 |
| 5,4                 | 5,31     | 5,04     | 4,77               | 4,67     | 4,45     | 38,265       | 24,866      | -1,5388                       | 0,01393063   | NM_000387       | SLC25A20     | solute carrier family 25 (carnitine/acylcarnitine translocase), member 20 | Yes                             |
| 6,42                | 6,33     | 6,3      | 5,88               | 5,81     | 5,47     | 81,623       | 53,1063     | -1,537                        | 0,004392499  | NM_001083       | PDE5A        | phosphodiesterase 5A, cGMP-specific                                       |                                 |
| 8,26                | 8,02     | 8,09     | 7,24               | 7,61     | 7,64     | 279,536      | 181,998     | -1,5359                       | 0,009487901  | XR_111692       | LOC100287562 | uncharacterized LOC100287562                                              |                                 |
| 8,15                | 8,26     | 8,22     | 7,59               | 7,6      | 7,59     | 296,259      | 193,1187    | -1,5341                       | 9,68563E-05  | NM_016513       | ICK          | intestinal cell (MAK-like) kinase                                         |                                 |
| 5,94                | 6,01     | 6,18     | 5,29               | 5,37     | 5,61     | 66,1143      | 43,1063     | -1,5337                       | 0,006541503  | ENST00000355090 | ABCA2        | ATP-binding cassette, sub-family A (ABC1), member 2                       |                                 |
| 7,79                | 7,61     | 7,59     | 7,24               | 6,97     | 6,92     | 203,1183     | 132,5427    | -1,5325                       | 0,005744356  | NM_001142307    | GTF2H1       | general transcription factor IIH, polypeptide 1, 62kDa                    | Yes                             |
| 5,33                | 5,08     | 5,19     | 4,49               | 4,66     | 4,61     | 36,851       | 24,0573     | -1,5318                       | 0,0032581    | NM_130783       | TSPAN18      | tetraspanin 18                                                            |                                 |
| 6,14                | 6,19     | 6,23     | 5,67               | 5,59     | 5,45     | 72,864       | 47,5983     | -1,5308                       | 0,000518662  | ENST00000523483 | SDCBP        | syndecan binding protein (syntenin)                                       | Yes                             |
| 9,89                | 9,87     | 9,82     | 9,37               | 9,17     | 9,19     | 929,4923     | 607,262     | -1,5306                       | 0,000448194  | NM_001128619    | LUZP6        | leucine zipper protein 6                                                  |                                 |
| 5,63                | 5,16     | 5,57     | 5,11               | 4,77     | 4,64     | 44,26        | 28,9173     | -1,5306                       | 0,041360179  | ENST00000370828 | GPC4         | glypican 4                                                                |                                 |
| 6,43                | 6,4      | 6,26     | 5,72               | 5,54     | 5,98     | 82,437       | 54,1187     | -1,5233                       | 0,007501435  | NM_001077525    | MTMR14       | myotubularin related protein 14                                           |                                 |
| 6,51                | 6,45     | 6,6      | 6,04               | 5,87     | 5,83     | 91,8573      | 60,39       | -1,5211                       | 0,001296534  | NM_001031804    | MAF          | v-maf musculoaponeurotic fibrosarcoma oncogene homolog (avian)            |                                 |
| 5,47                | 5,51     | 5,38     | 4,74               | 4,99     | 4,81     | 43,8457      | 28,851      | -1,5197                       | 0,001410735  | NM_001031738    | TMEM150A     | transmembrane protein 150A                                                |                                 |
| 11,22               | 11,27    | 11,31    | 10,71              | 10,65    | 10,63    | 2464,5963    | 1622,1993   | -1,5193                       | 8,53278E-05  | NM_001199671    | CALU         | calumenin                                                                 | Yes                             |
| 7,58                | 7,48     | 7,37     | 6,84               | 6,92     | 6,87     | 178,4297     | 117,5427    | -1,518                        | 0,001398784  | NM_001005388    | NFASC        | neurofascin                                                               |                                 |
| 6,34                | 6,41     | 6,43     | 5,86               | 5,86     | 5,65     | 84,089       | 55,4583     | -1,5163                       | 0,000727475  | NM_003821       | RIPK2        | receptor-interacting serine-threonine kinase 2                            |                                 |
| 5,7                 | 6,23     | 5,91     | 5,27               | 5,55     | 5,25     | 62,3913      | 41,164      | -1,5157                       | 0,0443443676 | NM_001166347    | SLC26A11     | solute carrier family 26, member 11                                       |                                 |
| 5,94                | 6,02     | 5,98     | 5,43               | 5,38     | 5,33     | 63,135       | 41,6593     | -1,5155                       | 8,09966E-05  | NM_001122679    | ODZ2         | odz, odd Oz/ten-m homolog 2 (Drosophila)                                  |                                 |
| 6,63                | 6,41     | 6,64     | 5,99               | 6,01     | 5,89     | 94,6043      | 62,435      | -1,5152                       | 0,003101883  | NM_001251978    | RCAN3        | RCAN family member 3                                                      |                                 |

| Pre-miR-Ctrl (Log2) |          |          | Pre-miR-132 (Log2) |          |          | Average      |             | Fold Change (miR-132 vs Ctrl) | p-value     | Gene Assignment |              |                                                                    | Predicted miR-132 binding sites |
|---------------------|----------|----------|--------------------|----------|----------|--------------|-------------|-------------------------------|-------------|-----------------|--------------|--------------------------------------------------------------------|---------------------------------|
| Sample 1            | Sample 2 | Sample 3 | Sample 1           | Sample 2 | Sample 3 | Pre-miR-Ctrl | Pre-miR-132 |                               |             | Public id       | Symbol       | Name                                                               |                                 |
| 5,34                | 5,01     | 5,29     | 4,72               | 4,46     | 4,67     | 37,2837      | 24,607      | -1,5152                       | 0,011728296 | NM_001010897    | SERP2        | stress-associated endoplasmic reticulum protein family member 2    |                                 |
| 8,94                | 9,29     | 9,26     | 8,26               | 8,79     | 8,62     | 576,748      | 380,8793    | -1,5143                       | 0,02870053  | ENST00000372868 | WISP2        | WNT1 inducible signaling pathway protein 2                         |                                 |
| 6,81                | 6,87     | 6,59     | 6,17               | 6,14     | 6,18     | 108,504      | 71,677      | -1,5138                       | 0,004187119 | ENST00000458276 | ABHD5        | abhydrolase domain containing 5                                    |                                 |
| 4,97                | 5,36     | 5,21     | 4,37               | 4,65     | 4,73     | 36,475       | 24,1077     | -1,513                        | 0,020531859 | NM_001143981    | CHRDL1       | chordin-like 1                                                     |                                 |
| 6,93                | 6,8      | 6,94     | 6,19               | 6,44     | 6,24     | 118,718      | 78,472      | -1,5129                       | 0,001981762 | NM_001142550    | WDR47        | WD repeat domain 47                                                |                                 |
| 5,39                | 5,45     | 5,45     | 4,82               | 4,87     | 4,81     | 43,1197      | 28,5133     | -1,5123                       | 3,09593E-05 | NR_003109       | TRNAU1AP     | tRNA selenocysteine 1 associated protein 1                         | Yes                             |
| 6,09                | 6,25     | 6,32     | 5,51               | 5,65     | 5,72     | 74,7073      | 49,4977     | -1,5093                       | 0,003397683 | NM_001100913    | PACS2        | phosphofurin acidic cluster sorting protein 2                      |                                 |
| 7,5                 | 7,64     | 7,63     | 6,98               | 6,9      | 7,11     | 192,8577     | 127,9357    | -1,5075                       | 0,001295037 | NM_013449       | BAZ2A        | bromodomain adjacent to zinc finger domain, 2A                     |                                 |
| 6,75                | 6,73     | 7,01     | 6,25               | 6,21     | 6,27     | 114,226      | 75,7697     | -1,5075                       | 0,006537649 | NM_005461       | MAFB         | v-maf musculoaponeurotic fibrosarcoma oncogene homolog B (avian)   |                                 |
| 7,5                 | 7,38     | 7,65     | 6,81               | 7,04     | 6,91     | 182,815      | 121,3547    | -1,5065                       | 0,005759168 | NM_007039       | PTPN21       | protein tyrosine phosphatase, non-receptor type 21                 |                                 |
| 7,34                | 7,59     | 7,51     | 6,8                | 6,96     | 6,92     | 178,989      | 119,0083    | -1,504                        | 0,003629957 | NM_213560       | PKN1         | protein kinase N1                                                  |                                 |
| 6,46                | 6,27     | 6,66     | 5,87               | 5,82     | 5,96     | 88,7773      | 59,076      | -1,5028                       | 0,014062644 | NR_027297       | HOMER3       | homer homolog 3 (Drosophila)                                       |                                 |
| 6,31                | 6,61     | 6,68     | 5,97               | 6,01     | 5,88     | 93,1863      | 62,0067     | -1,5028                       | 0,012643223 | NM_017631       | DDX60        | DEAD (Asp-Glu-Ala-Asp) box polypeptide 60                          |                                 |
| 5,9                 | 6,26     | 6,09     | 5,47               | 5,43     | 5,61     | 68,1577      | 45,425      | -1,5004                       | 0,011854274 | ENST00000216039 | JOSD1        | Josephin domain containing 1                                       | Yes                             |
| 6,78                | 6,72     | 6,66     | 6,03               | 6,14     | 6,23     | 105,4803     | 70,3093     | -1,5002                       | 0,00074257  | NM_014732       | KIAA0513     | KIAA0513                                                           |                                 |
| 4,38                | 4,74     | 4,75     | 5,39               | 5,28     | 4,95     | 24,8177      | 37,2323     | 1,5002                        | 0,031996551 | NM_020784       | TXNDC16      | thioredoxin domain containing 16                                   |                                 |
| 5,18                | 4,92     | 5,17     | 5,75               | 5,66     | 5,63     | 34,176       | 51,3007     | 1,5011                        | 0,001860797 | NM_182503       | ADAT2        | adenosine deaminase, tRNA-specific 2                               |                                 |
| 5,02                | 4,68     | 5,11     | 5,48               | 5,36     | 5,74     | 30,872       | 46,3827     | 1,5024                        | 0,027156227 | AF422192        | LOC100288160 | esophagus cancer-related gene-2 interaction susceptibility protein |                                 |
| 9,39                | 9,59     | 9,41     | 10,01              | 10,05    | 10,1     | 707,298      | 1062,9097   | 1,5028                        | 0,000666195 | NM_013417       | IARS         | isoleucyl-tRNA synthetase                                          |                                 |
| 5,66                | 5,64     | 5,61     | 6,19               | 6,4      | 6,07     | 49,7567      | 74,88       | 1,5049                        | 0,007873937 | NR_003610       | PDXDC2P      | pyridoxal-dependent decarboxylase domain containing 2, pseudogen   |                                 |
| 7                   | 6,92     | 6,75     | 7,39               | 7,49     | 7,57     | 118,91       | 179,1727    | 1,5068                        | 0,002368528 | NR_046315       | BLOC1S2      | biogenesis of lysosomal organelles complex-1, subunit 2            |                                 |
| 4,65                | 4,59     | 4,71     | 5,2                | 5,45     | 5,05     | 25,1213      | 37,8663     | 1,5073                        | 0,01574947  | NM_014496       | RPS6KA6      | ribosomal protein S6 kinase, 90kDa, polypeptide 6                  |                                 |
| 7,19                | 7,21     | 6,63     | 7,73               | 7,51     | 7,63     | 131,0393     | 197,5573    | 1,5076                        | 0,02170431  | NM_001827       | CKS2         | CDC28 protein kinase regulatory subunit 2                          |                                 |
| 9,68                | 9,78     | 9,82     | 10,31              | 10,25    | 10,49    | 867,785      | 1308,4537   | 1,5078                        | 0,003430789 | ENST00000524558 | SERPINH1     | serpin peptidase inhibitor, clade H (heat shock protein 47), membe |                                 |
| 5,08                | 4,61     | 5,24     | 5,52               | 5,59     | 5,67     | 32,0123      | 48,323      | 1,5095                        | 0,018111908 | ENST00000457714 | NLGN1        | neuroligin 1                                                       |                                 |
| 5,81                | 6,39     | 6,04     | 6,76               | 6,63     | 6,69     | 68,589       | 103,559     | 1,5098                        | 0,015099105 | ENST00000498004 | CA5B         | carbonic anhydrase VB, mitochondrial                               |                                 |
| 5,9                 | 5,6      | 5,34     | 6,24               | 6,05     | 6,37     | 49,5737      | 74,8507     | 1,5099                        | 0,026095897 | ENST00000369158 | HIST2H3D     | histone cluster 2, H3d                                             |                                 |
| 4,58                | 4,62     | 4,24     | 5,13               | 5,11     | 5,01     | 22,468       | 33,925      | 1,5099                        | 0,004537176 | AK127211        | DNAH10OS     | dynein, axonemal, heavy chain 10 opposite strand                   |                                 |
| 4,8                 | 4,46     | 4,91     | 5,24               | 5,26     | 5,48     | 26,644       | 40,2477     | 1,5106                        | 0,013949134 | NM_005522       | HOXA1        | homeobox A1                                                        |                                 |
| 5,99                | 6,63     | 6,38     | 6,77               | 6,97     | 7,1      | 81,9627      | 123,8967    | 1,5116                        | 0,032830043 | ENST00000261326 | MOCOS        | molybdenum cofactor sulfurase                                      |                                 |
| 9,15                | 9,35     | 9,45     | 9,71               | 9,93     | 10,09    | 640,0293     | 967,6493    | 1,5119                        | 0,016496735 | NM_012098       | ANGPTL2      | angiopoietin-like 2                                                |                                 |
| 5,93                | 5,78     | 5,45     | 6,24               | 6,37     | 6,38     | 53,21        | 80,527      | 1,5134                        | 0,008330904 | NM_006461       | SPAG5        | sperm associated antigen 5                                         |                                 |
| 5,38                | 5,16     | 4,98     | 5,85               | 5,75     | 5,74     | 36,3183      | 54,981      | 1,5139                        | 0,004420089 | ENST00000433078 | C7orf23      | chromosome 7 open reading frame 23                                 |                                 |
| 5,45                | 4,83     | 5,24     | 5,65               | 5,8      | 5,92     | 36,6493      | 55,492      | 1,5141                        | 0,024471759 | ENST00000394715 | ZBTB25       | zinc finger and BTB domain containing 25                           |                                 |
| 6,61                | 6,36     | 6,8      | 7,22               | 7,22     | 7,16     | 97,0833      | 147,0617    | 1,5148                        | 0,0045502   | AF400488        | SNRPN        | small nuclear ribonucleoprotein polypeptide N                      |                                 |
| 5,9                 | 5,55     | 5,87     | 6,44               | 6,29     | 6,41     | 55,0167      | 83,3693     | 1,5153                        | 0,004301109 | NM_015271       | TRIM2        | tripartite motif containing 2                                      |                                 |
| 7,7                 | 7,42     | 7,55     | 8,33               | 7,9      | 8,22     | 188,865      | 286,2743    | 1,5158                        | 0,022219358 | NR_027337       | HIST2H2BA    | histone cluster 2, H2ba (pseudogene)                               |                                 |
| 6,17                | 6,26     | 6,17     | 6,74               | 6,79     | 6,87     | 73,549       | 111,5073    | 1,5161                        | 0,000334466 | ENST00000550765 | FKBP11       | FK506 binding protein 11, 19 kDa                                   |                                 |
| 4,94                | 4,83     | 4,75     | 5,28               | 5,4      | 5,63     | 28,6827      | 43,5333     | 1,5178                        | 0,0112204   | NM_001025366    | VEGFA        | vascular endothelial growth factor A                               |                                 |
| 4,98                | 4,85     | 5,04     | 5,62               | 5,57     | 5,49     | 31,0997      | 47,209      | 1,518                         | 0,000717547 | NR_003237       | SNORD113-9   | small nucleolar RNA, C/D box 113-9                                 |                                 |

| Pre-miR-Ctrl (Log2) |          |          | Pre-miR-132 (Log2) |          |          | Average      |             | Fold Change (miR-132 vs Ctrl) | p-value     | Gene Assignment |              |                                                                | Predicted miR-132 binding sites |
|---------------------|----------|----------|--------------------|----------|----------|--------------|-------------|-------------------------------|-------------|-----------------|--------------|----------------------------------------------------------------|---------------------------------|
| Sample 1            | Sample 2 | Sample 3 | Sample 1           | Sample 2 | Sample 3 | Pre-miR-Ctrl | Pre-miR-132 |                               |             | Public id       | Symbol       | Name                                                           |                                 |
| 5,32                | 5,41     | 5,45     | 6,15               | 5,93     | 5,9      | 42,0593      | 63,8983     | 1,5192                        | 0,004304102 | NM_003503       | CDC7         | cell division cycle 7 homolog (S. cerevisiae)                  |                                 |
| 7,97                | 8,01     | 7,88     | 8,64               | 8,49     | 8,54     | 248,027      | 376,8957    | 1,5196                        | 0,000640887 | NM_016657       | KDEL3        | KDEL (Lys-Asp-Glu-Leu) endoplasmic reticulum protein retention |                                 |
| 7,17                | 7,04     | 7,08     | 7,76               | 7,65     | 7,7      | 136,968      | 208,5193    | 1,5224                        | 0,000263818 | NM_005080       | XBP1         | X-box binding protein 1                                        |                                 |
| 5,08                | 5,13     | 4,92     | 5,83               | 5,59     | 5,53     | 33,0387      | 50,42       | 1,5261                        | 0,008292542 | ENST00000268138 | C15orf42     | chromosome 15 open reading frame 42                            |                                 |
| 4,34                | 4,13     | 4,61     | 5,04               | 4,96     | 4,95     | 20,727       | 31,645      | 1,5268                        | 0,006584287 | ENST00000493990 | ARL6         | ADP-ribosylation factor-like 6                                 |                                 |
| 6,15                | 6,27     | 6,27     | 6,74               | 6,7      | 7,06     | 75,1187      | 114,765     | 1,5278                        | 0,014474738 | NM_182513       | SPC24        | SPC24, NDC80 kinetochore complex component, homolog (S. ce     |                                 |
| 8,2                 | 8,26     | 8,1      | 8,74               | 8,88     | 8,78     | 291,6653     | 446,0957    | 1,5295                        | 0,000647159 | NM_001243246    | LEPRE1       | leucine proline-enriched proteoglycan (leprecan) 1             |                                 |
| 5,16                | 5,19     | 5,35     | 5,95               | 5,92     | 5,66     | 37,681       | 57,6437     | 1,5298                        | 0,006825162 | NM_153704       | TMEM67       | transmembrane protein 67                                       |                                 |
| 6,02                | 5,88     | 5,73     | 6,39               | 6,55     | 6,54     | 58,9537      | 90,2067     | 1,5301                        | 0,002574952 | NM_015846       | MBD1         | methyl-CpG binding domain protein 1                            |                                 |
| 5,42                | 5,31     | 5,16     | 5,93               | 6,11     | 5,67     | 39,4127      | 60,318      | 1,5304                        | 0,020652815 | NM_006670       | TPBG         | trophoblast glycoprotein                                       |                                 |
| 4,5                 | 4,8      | 4,23     | 5,31               | 4,91     | 5,18     | 23,0833      | 35,3293     | 1,5305                        | 0,033586621 | NM_020315       | PDXP         | pyridoxal (pyridoxine, vitamin B6) phosphatase                 |                                 |
| 5,37                | 4,94     | 5,26     | 5,9                | 5,72     | 5,82     | 36,79        | 56,3057     | 1,5305                        | 0,006569036 | NM_001102559    | PPAPDC1B     | phosphatidic acid phosphatase type 2 domain containing 1B      |                                 |
| 4,82                | 4,64     | 4,43     | 5,5                | 5,01     | 5,21     | 24,9117      | 38,164      | 1,532                         | 0,036036512 | NM_001185181    | PFDN6        | prefoldin subunit 6                                            |                                 |
| 6,09                | 5,63     | 5,96     | 6,61               | 6,72     | 6,18     | 59,964       | 91,8687     | 1,5321                        | 0,048288229 | NM_020652       | ZNF286A      | zinc finger protein 286A                                       |                                 |
| 8,17                | 7,93     | 7,86     | 8,34               | 8,79     | 8,66     | 254,7383     | 390,3927    | 1,5325                        | 0,025102328 | NR_037447       | MIR3676      | microRNA 3676                                                  |                                 |
| 8,14                | 8,02     | 7,95     | 8,7                | 8,53     | 8,73     | 262,9807     | 403,377     | 1,5339                        | 0,002115212 | NM_021982       | SEC24A       | SEC24 family, member A (S. cerevisiae)                         |                                 |
| 8,29                | 8,43     | 8,7      | 9,04               | 9,1      | 9,16     | 357,9203     | 549,0643    | 1,534                         | 0,004483914 | ENST00000295213 | SPATA18      | spermatogenesis associated 18                                  |                                 |
| 7,44                | 7,41     | 7,39     | 7,94               | 8,1      | 8,05     | 170,4823     | 261,658     | 1,5348                        | 0,000459464 | BC019843        | C12orf49     | chromosome 12 open reading frame 49                            |                                 |
| 6,75                | 6,69     | 7,04     | 7,43               | 7,49     | 7,45     | 114,1613     | 175,6893    | 1,539                         | 0,002465165 | ENST00000370986 | GADD45A      | growth arrest and DNA-damage-inducible, alpha                  |                                 |
| 6,28                | 5,99     | 6,03     | 6,66               | 6,62     | 6,89     | 68,8703      | 106,0293    | 1,5396                        | 0,008654073 | NM_014573       | TMEM97       | transmembrane protein 97                                       |                                 |
| 9,38                | 9,48     | 9,4      | 9,97               | 10,03    | 10,13    | 685,328      | 1056,333    | 1,5414                        | 0,000578066 | NM_001605       | AARS         | alanyl-tRNA synthetase                                         |                                 |
| 5                   | 4,9      | 4,79     | 5,31               | 5,81     | 5,4      | 29,8407      | 45,9993     | 1,5415                        | 0,037145568 | AK303556        | LOC100505620 | uncharacterized LOC100505620                                   |                                 |
| 5,05                | 5,21     | 5,1      | 5,84               | 5,87     | 5,5      | 34,813       | 53,674      | 1,5418                        | 0,012562998 | NM_001145293    | NGLY1        | N-glycanase 1                                                  |                                 |
| 7,32                | 7,34     | 7,37     | 8,13               | 7,98     | 7,78     | 162,408      | 250,8027    | 1,5443                        | 0,007250675 | NM_006948       | HSPA13       | heat shock protein 70kDa family, member 13                     |                                 |
| 5,06                | 5,36     | 5,32     | 5,74               | 6,14     | 5,72     | 38,1253      | 58,8927     | 1,5447                        | 0,029976163 | ENST00000281830 | KCNE4        | potassium voltage-gated channel, Isk-related family, member 4  |                                 |
| 6,46                | 6,48     | 6,36     | 7,2                | 6,94     | 7,04     | 86,4793      | 133,806     | 1,5473                        | 0,003098695 | NM_018136       | ASPM         | asp (abnormal spindle) homolog, microcephaly associated (Droso |                                 |
| 6,87                | 6,71     | 6,79     | 7,2                | 7,46     | 7,58     | 110,774      | 171,481     | 1,548                         | 0,010765012 | NM_206538       | EMC10        | ER membrane protein complex subunit 10                         |                                 |
| 6,32                | 6,54     | 6,52     | 7,09               | 7,17     | 7,02     | 88,24        | 136,6777    | 1,5489                        | 0,001176318 | NR_026641       | INTS2        | integrator complex subunit 2                                   |                                 |
| 5,13                | 5,16     | 5,22     | 5,9                | 5,57     | 5,91     | 36,0137      | 55,7827     | 1,5489                        | 0,009210287 | NR_040001       | LOC375295    | uncharacterized LOC375295                                      |                                 |
| 5,38                | 5        | 5,17     | 5,81               | 5,82     | 5,84     | 36,5483      | 56,626      | 1,5493                        | 0,002052831 | NM_006845       | KIF2C        | kinesin family member 2C                                       |                                 |
| 4,73                | 4,22     | 4,67     | 5,27               | 4,99     | 5,29     | 23,5437      | 36,4963     | 1,5502                        | 0,019339464 | NM_014254       | TMEM5        | transmembrane protein 5                                        |                                 |
| 8,66                | 8,55     | 8,68     | 9,32               | 9,19     | 9,28     | 396,485      | 614,9613    | 1,551                         | 0,000368643 | ENST00000504154 | SLIT2        | slit homolog 2 (Drosophila)                                    |                                 |
| 5,73                | 5,64     | 5,87     | 6,3                | 6,53     | 6,31     | 53,8093      | 83,515      | 1,5521                        | 0,004364745 | ENST00000403410 | TMEM45A      | transmembrane protein 45A                                      |                                 |
| 4,2                 | 4,37     | 4,61     | 5,05               | 5,04     | 5,03     | 21,159       | 32,9        | 1,5549                        | 0,002653618 | AK002146        | LOC153684    | uncharacterized LOC153684                                      |                                 |
| 7,28                | 7,27     | 7,5      | 7,9                | 8,01     | 8,06     | 163,593      | 254,5027    | 1,5557                        | 0,001629995 | ENST00000285021 | XPC          | xeroderma pigmentosum, complementation group C                 |                                 |
| 5,17                | 5,09     | 5,48     | 6,13               | 5,72     | 5,8      | 38,2313      | 59,4867     | 1,556                         | 0,027325037 | NM_003509       | HIST1H2AI    | histone cluster 1, H2ai                                        |                                 |
| 6,46                | 6,63     | 6,39     | 7,29               | 6,92     | 7,17     | 90,3147      | 140,5333    | 1,556                         | 0,011339436 | NM_001201362    | HMG3         | high mobility group nucleosomal binding domain 3               |                                 |
| 5,21                | 5,68     | 5,81     | 6,42               | 6,19     | 6,05     | 48,1283      | 74,9643     | 1,5576                        | 0,029180283 | NM_012189       | CABYR        | calcium binding tyrosine-(Y)-phosphorylation regulated         |                                 |
| 4,6                 | 4,55     | 4,79     | 5,26               | 5,42     | 5,18     | 25,1137      | 39,1283     | 1,558                         | 0,00385701  | NM_004412       | TRDMT1       | tRNA aspartic acid methyltransferase 1                         |                                 |
| 7,23                | 6,75     | 7,18     | 7,81               | 7,67     | 7,64     | 134,2557     | 209,178     | 1,5581                        | 0,008350559 | NM_001134445    | DDAH1        | dimethylarginine dimethylaminohydrolase 1                      |                                 |

| Pre-miR-Ctrl (Log2) |          |          | Pre-miR-132 (Log2) |          |          | Average      |             | Fold Change (miR-132 vs Ctrl) | p-value     | Gene Assignment |              |                                                                                    | Predicted miR-132 binding sites |
|---------------------|----------|----------|--------------------|----------|----------|--------------|-------------|-------------------------------|-------------|-----------------|--------------|------------------------------------------------------------------------------------|---------------------------------|
| Sample 1            | Sample 2 | Sample 3 | Sample 1           | Sample 2 | Sample 3 | Pre-miR-Ctrl | Pre-miR-132 |                               |             | Public id       | Symbol       | Name                                                                               |                                 |
| 8,97                | 9,3      | 9,16     | 9,89               | 9,5      | 9,94     | 567,9533     | 885,063     | 1,5583                        | 0,023711164 | NR_006881       | SNORD3C      | small nucleolar RNA, C/D box 3C                                                    |                                 |
| 9,35                | 9,14     | 9,23     | 9,95               | 9,69     | 9,99     | 605,747      | 944,0157    | 1,5584                        | 0,006441333 | NM_001008397    | GPX8         | glutathione peroxidase 8 (putative)                                                |                                 |
| 6,8                 | 7,07     | 6,96     | 7,59               | 7,65     | 7,52     | 123,4313     | 192,3573    | 1,5584                        | 0,001155188 | NM_006502       | POLH         | polymerase (DNA directed), eta                                                     |                                 |
| 5,28                | 5,51     | 5,48     | 6,26               | 5,89     | 6,03     | 43,0187      | 67,0953     | 1,5597                        | 0,011879248 | NM_001201480    | OSBPL6       | oxysterol binding protein-like 6                                                   |                                 |
| 6,4                 | 6,05     | 6,23     | 7,02               | 6,72     | 6,87     | 75,2557      | 117,3923    | 1,5599                        | 0,008658143 | ENST00000554684 | SMEK1        | SMEK homolog 1, suppressor of mek1 (Dictyostelium)                                 |                                 |
| 4,72                | 4,69     | 4,96     | 5,34               | 5,26     | 5,68     | 27,7643      | 43,3637     | 1,5618                        | 0,022931756 | NM_003256       | TIMP4        | TIMP metalloproteinase inhibitor 4                                                 |                                 |
| 8,4                 | 8,45     | 8,13     | 8,98               | 8,92     | 9,03     | 322,5463     | 504,0303    | 1,5627                        | 0,001684449 | ENST00000265748 | ANLN         | anillin, actin binding protein                                                     |                                 |
| 4,74                | 4,13     | 4,45     | 5,11               | 5,14     | 5,07     | 22,0297      | 34,4623     | 1,5644                        | 0,010057372 | NR_024452       | LOC100134259 | uncharacterized LOC100134259                                                       |                                 |
| 5,38                | 5,39     | 5,3      | 6,13               | 5,95     | 5,92     | 40,991       | 64,1343     | 1,5646                        | 0,001677307 | ENST00000423383 | CENPI        | centromere protein I                                                               |                                 |
| 6,87                | 6,36     | 6,38     | 7,26               | 7,08     | 7,26     | 94,1317      | 147,284     | 1,5647                        | 0,014610364 | NM_016059       | PPIL1        | peptidylprolyl isomerase (cyclophilin)-like 1                                      |                                 |
| 4,37                | 4,3      | 4,73     | 5,27               | 4,8      | 5,26     | 22,3047      | 34,921      | 1,5656                        | 0,037786719 | ENST00000356316 | CAPN3        | calpain 3, (p94)                                                                   |                                 |
| 6,36                | 6,3      | 6,39     | 7,21               | 6,88     | 6,88     | 81,599       | 127,8747    | 1,5671                        | 0,010522152 | NR_003232       | SNORD113-4   | small nucleolar RNA, C/D box 113-4                                                 |                                 |
| 8,16                | 8,31     | 7,77     | 8,74               | 8,64     | 8,85     | 273,8887     | 429,3123    | 1,5675                        | 0,010643569 | NM_005733       | KIF20A       | kinesin family member 20A                                                          |                                 |
| 6,66                | 6,88     | 6,86     | 7,47               | 7,47     | 7,42     | 111,6903     | 175,281     | 1,5693                        | 0,000360579 | NM_015187       | SEL1L3       | sel-1 suppressor of lin-12-like 3 (C. elegans)                                     |                                 |
| 7,31                | 7,27     | 6,9      | 7,76               | 7,78     | 7,92     | 144,1513     | 226,2503    | 1,5695                        | 0,005150328 | ENST00000338825 | EIF4EBP1     | eukaryotic translation initiation factor 4E binding protein 1                      |                                 |
| 6,04                | 6,01     | 5,84     | 6,68               | 6,7      | 6,46     | 62,5087      | 98,18       | 1,5707                        | 0,003399955 | ENST00000301905 | PBK          | PDZ binding kinase                                                                 |                                 |
| 5,57                | 5,41     | 5,46     | 5,94               | 6,11     | 6,33     | 44,68        | 70,3043     | 1,5735                        | 0,011052606 | NM_198596       | SULF2        | sulfatase 2                                                                        |                                 |
| 4,89                | 4,38     | 4,74     | 5,54               | 5,19     | 5,28     | 25,7317      | 40,6283     | 1,5789                        | 0,020197497 | NM_000270       | PNP          | purine nucleoside phosphorylase                                                    |                                 |
| 4,75                | 4,79     | 4,53     | 5,33               | 5,18     | 5,53     | 25,8923      | 40,894      | 1,5794                        | 0,009586784 | NM_001130914    | BTG3         | BTG family, member 3                                                               |                                 |
| 5,37                | 5,14     | 5,21     | 5,87               | 5,97     | 5,87     | 37,8767      | 59,8843     | 1,581                         | 0,000654113 | BC080646        | SNRPN        | small nuclear ribonucleoprotein polypeptide N                                      |                                 |
| 5,81                | 5,87     | 5,52     | 6,57               | 6,27     | 6,35     | 53,4917      | 84,5847     | 1,5813                        | 0,009290075 | NM_014875       | KIF14        | kinesin family member 14                                                           |                                 |
| 6,73                | 6,88     | 6,92     | 7,47               | 7,59     | 7,46     | 115,0107     | 182,0117    | 1,5826                        | 0,000667344 | NM_003882       | WISP1        | WNT1 inducible signaling pathway protein 1                                         |                                 |
| 7,44                | 7,49     | 7,4      | 8,11               | 8,09     | 8,12     | 174,1037     | 275,655     | 1,5833                        | 9,0709E-06  | NM_013231       | FLRT2        | fibronectin leucine rich transmembrane protein 2                                   |                                 |
| 9,44                | 9,45     | 9,42     | 10,15              | 10,07    | 10,08    | 693,0043     | 1097,8317   | 1,5842                        | 3,35408E-05 | NM_006854       | KDEL2        | KDEL (Lys-Asp-Glu-Leu) endoplasmic reticulum protein retention                     |                                 |
| 7,77                | 7,68     | 7,33     | 8,27               | 8,19     | 8,35     | 194,749      | 309,0037    | 1,5867                        | 0,00461836  | ENST00000300093 | PLK1         | polo-like kinase 1                                                                 |                                 |
| 7,29                | 7,16     | 7,1      | 7,96               | 7,76     | 7,83     | 145,566      | 231,1037    | 1,5876                        | 0,001508345 | ENST00000310823 | ADAM17       | ADAM metalloproteinase domain 17                                                   |                                 |
| 7,97                | 7,78     | 8,03     | 8,7                | 8,53     | 8,56     | 243,968      | 387,644     | 1,5889                        | 0,001628869 | NM_002860       | ALDH18A1     | aldehyde dehydrogenase 18 family, member A1                                        |                                 |
| 4,78                | 4,37     | 4,29     | 5,27               | 5,3      | 4,89     | 22,5713      | 35,878      | 1,5895                        | 0,028804728 | NM_001033719    | ZNF404       | zinc finger protein 404                                                            |                                 |
| 6,05                | 5,87     | 5,41     | 6,61               | 6,51     | 6,27     | 55,7533      | 88,664      | 1,5903                        | 0,023563191 | NR_003209       | SNORD114-16  | small nucleolar RNA, C/D box 114-16                                                |                                 |
| 9,06                | 8,87     | 8,88     | 9,65               | 9,59     | 9,59     | 490,92       | 781,5953    | 1,5921                        | 0,000268722 | ENST00000259056 | GALNT5       | UDP-N-acetyl-alpha-D-galactosamine:polypeptide N-acetylgalactosaminyltransferase 5 |                                 |
| 4,2                 | 4,44     | 4,38     | 4,97               | 5,27     | 4,76     | 20,302       | 32,341      | 1,593                         | 0,026271654 | ENST00000395321 | ALDOC        | aldolase C, fructose-bisphosphate                                                  |                                 |
| 5,25                | 4,92     | 5,26     | 5,88               | 5,78     | 5,81     | 35,5493      | 56,6477     | 1,5935                        | 0,001864091 | NM_032016       | STARD3NL     | STARD3 N-terminal like                                                             |                                 |
| 7,81                | 7,74     | 7,65     | 8,39               | 8,35     | 8,48     | 213,016      | 339,601     | 1,5943                        | 0,000371945 | NM_018184       | ARL8B        | ADP-ribosylation factor-like 8B                                                    |                                 |
| 5,9                 | 5,8      | 5,61     | 6,45               | 6,34     | 6,55     | 54,7563      | 87,3787     | 1,5958                        | 0,002542128 | NM_005787       | ALG3         | asparagine-linked glycosylation 3, alpha-1,3- mannosyltransferase                  |                                 |
| 4,9                 | 5,08     | 5        | 5,55               | 5,9      | 5,54     | 31,894       | 51,0307     | 1,6                           | 0,0130471   | NR_047669       | FAM173B      | family with sequence similarity 173, member B                                      |                                 |
| 5,75                | 5,69     | 5,84     | 6,62               | 6,39     | 6,3      | 54,2413      | 87,006      | 1,6041                        | 0,005767169 | ENST00000498286 | MTO1         | mitochondrial translation optimization 1 homolog (S. cerevisiae)                   |                                 |
| 6,71                | 6,61     | 6,58     | 7,32               | 7,48     | 7,14     | 99,3473      | 159,7857    | 1,6084                        | 0,005634298 | NM_017752       | TBC1D8B      | TBC1 domain family, member 8B (with GRAM domain)                                   |                                 |
| 7,15                | 7,45     | 7,27     | 7,97               | 7,99     | 7,99     | 157,0737     | 253,0653    | 1,6111                        | 0,00057253  | NM_002079       | GOT1         | glutamic-oxaloacetic transaminase 1, soluble (aspartate aminotransferase)          |                                 |
| 6,03                | 6,02     | 5,71     | 6,69               | 6,47     | 6,68     | 60,8613      | 98,1447     | 1,6126                        | 0,004282326 | ENST00000446531 | H2AFV        | H2A histone family, member V                                                       |                                 |
| 4,62                | 4,32     | 4,33     | 5,4                | 5,11     | 4,8      | 21,5583      | 34,8723     | 1,6176                        | 0,039433923 | NM_020445       | ACTR3B       | ARP3 actin-related protein 3 homolog B (yeast)                                     |                                 |

| Pre-miR-Ctrl (Log2) |          |          | Pre-miR-132 (Log2) |          |          | Average      |             | Fold Change (miR-132 vs Ctrl) | p-value     | Gene Assignment |            |                                                                     | Predicted miR-132 binding sites |
|---------------------|----------|----------|--------------------|----------|----------|--------------|-------------|-------------------------------|-------------|-----------------|------------|---------------------------------------------------------------------|---------------------------------|
| Sample 1            | Sample 2 | Sample 3 | Sample 1           | Sample 2 | Sample 3 | Pre-miR-Ctrl | Pre-miR-132 |                               |             | Public id       | Symbol     | Name                                                                |                                 |
| 6,41                | 5,98     | 5,87     | 6,77               | 6,88     | 6,75     | 68,88        | 111,5187    | 1,619                         | 0,008293063 | NM_018410       | HJURP      | Holliday junction recognition protein                               |                                 |
| 4,92                | 4,82     | 5,1      | 5,68               | 5,44     | 5,8      | 30,939       | 50,1313     | 1,6203                        | 0,008755715 | NM_012118       | CCRN4L     | CCR4 carbon catabolite repression 4-like (S. cerevisiae)            |                                 |
| 6,07                | 6,05     | 5,85     | 6,82               | 6,49     | 6,74     | 63,7063      | 103,2537    | 1,6208                        | 0,006334889 | NM_145061       | SKA3       | spindle and kinetochore associated complex subunit 3                |                                 |
| 6,49                | 6,51     | 6,39     | 7,3                | 7,03     | 7,14     | 88,296       | 143,1067    | 1,6208                        | 0,002543491 | ENST00000395471 | PSPH       | phosphoserine phosphatase                                           |                                 |
| 4,62                | 4,19     | 4,11     | 5,11               | 4,97     | 4,98     | 20,0367      | 32,4783     | 1,6209                        | 0,007778137 | ENST00000480135 | CLDN12     | claudin 12                                                          |                                 |
| 8,61                | 8,62     | 8,69     | 9,28               | 9,34     | 9,39     | 399,0543     | 646,8853    | 1,621                         | 0,000098103 | NM_014774       | KIAA0494   | KIAA0494                                                            |                                 |
| 5,78                | 6,09     | 5,92     | 6,4                | 6,63     | 6,84     | 61,2053      | 99,352      | 1,6233                        | 0,015898483 | NM_005067       | SIAH2      | siah E3 ubiquitin protein ligase 2                                  |                                 |
| 6,34                | 6,5      | 6,07     | 7,07               | 7,1      | 6,86     | 79,5667      | 129,2377    | 1,6243                        | 0,006267442 | NM_006763       | BTG2       | BTG family, member 2                                                |                                 |
| 4,63                | 4,24     | 4,52     | 5,33               | 5,15     | 5,02     | 22,2         | 36,059      | 1,6243                        | 0,008260056 | NM_002703       | PPAT       | phosphoribosyl pyrophosphate amidotransferase                       |                                 |
| 5,43                | 5,24     | 5,49     | 6,08               | 6,1      | 6,1      | 41,9483      | 68,279      | 1,6277                        | 0,00026342  | NM_001137610    | FAM86B2    | family with sequence similarity 86, member B2                       |                                 |
| 4,42                | 4,38     | 4,2      | 4,99               | 5,07     | 5,06     | 20,2023      | 32,9097     | 1,629                         | 0,000307316 | NM_000112       | SLC26A2    | solute carrier family 26 (sulfate transporter), member 2            |                                 |
| 5,22                | 5,08     | 4,87     | 5,84               | 5,76     | 5,7      | 33,4463      | 54,486      | 1,6291                        | 0,001649539 | ENST00000286614 | MMP16      | matrix metalloproteinase 16 (membrane-inserted)                     |                                 |
| 9,58                | 9,45     | 9,46     | 10,29              | 10       | 10,3     | 723,0177     | 1178,892    | 1,6305                        | 0,004759079 | AK292062        | HIST1H2BK  | histone cluster 1, H2bk                                             |                                 |
| 6,81                | 6,34     | 6,43     | 7,33               | 7,23     | 7,18     | 93,1457      | 152,01      | 1,632                         | 0,005367902 | NM_180989       | GPR180     | G protein-coupled receptor 180                                      |                                 |
| 6,1                 | 6,15     | 6,09     | 6,87               | 6,77     | 6,82     | 69,242       | 113,031     | 1,6324                        | 5,59482E-05 | NM_005147       | DNAJA3     | DnaJ (Hsp40) homolog, subfamily A, member 3                         |                                 |
| 5,31                | 5,11     | 4,83     | 5,93               | 5,8      | 5,67     | 34,2163      | 55,866      | 1,6327                        | 0,007641991 | ENST00000419585 | FANCD2     | Fanconi anemia, complementation group D2                            |                                 |
| 7,23                | 7,17     | 7,06     | 7,69               | 7,95     | 7,94     | 142,522      | 233,1173    | 1,6357                        | 0,00308193  | NM_058219       | EXOSC6     | exosome component 6                                                 |                                 |
| 6,64                | 6,56     | 6,6      | 7,52               | 7,16     | 7,23     | 97,0307      | 158,894     | 1,6376                        | 0,00796951  | ENST00000406462 | GPSM2      | G-protein signaling modulator 2                                     |                                 |
| 7,09                | 6,57     | 6,73     | 7,57               | 7,58     | 7,42     | 112,4673     | 184,205     | 1,6379                        | 0,006723214 | NM_006915       | RP2        | retinitis pigmentosa 2 (X-linked recessive)                         |                                 |
| 4,57                | 4,44     | 4,6      | 5,18               | 5,49     | 5,05     | 23,2363      | 38,1073     | 1,64                          | 0,014743402 | NM_018349       | MCTP2      | multiple C2 domains, transmembrane 2                                |                                 |
| 4,76                | 4,79     | 4,85     | 5,7                | 5,58     | 5,23     | 27,867       | 45,7833     | 1,6429                        | 0,014370278 | NM_000059       | BRCA2      | breast cancer 2, early onset                                        |                                 |
| 6,97                | 6,75     | 7,03     | 7,79               | 7,5      | 7,61     | 121,2303     | 199,234     | 1,6434                        | 0,004700197 | NM_024089       | KDEL1      | KDEL (Lys-Asp-Glu-Leu) containing 1                                 |                                 |
| 5,33                | 5,27     | 5,34     | 6,04               | 5,99     | 6,06     | 39,7713      | 65,3583     | 1,6434                        | 2,12024E-05 | NM_024090       | ELOVL6     | ELOVL fatty acid elongase 6                                         |                                 |
| 6,41                | 6,31     | 6,31     | 7,07               | 6,95     | 7,16     | 81,2393      | 133,6723    | 1,6454                        | 0,000895085 | NM_145041       | TMEM106A   | transmembrane protein 106A                                          |                                 |
| 5,12                | 5,67     | 5,87     | 6,22               | 6,44     | 6,26     | 48,0583      | 79,335      | 1,6508                        | 0,017071154 | NM_000621       | HTR2A      | 5-hydroxytryptamine (serotonin) receptor 2A, G protein-coupled      |                                 |
| 4,94                | 5,32     | 4,91     | 5,91               | 5,8      | 5,66     | 33,5693      | 55,469      | 1,6524                        | 0,006585857 | ENST00000464609 | ARHGDI3    | Rho GDP dissociation inhibitor (GDI) gamma                          |                                 |
| 4,63                | 4,27     | 4,2      | 5,14               | 4,78     | 5,34     | 20,811       | 34,413      | 1,6536                        | 0,033542537 | NR_002318       | CATSPER2P1 | cation channel, sperm associated 2 pseudogene 1                     |                                 |
| 4,66                | 4,6      | 4,69     | 5,4                | 5,33     | 5,4      | 25,115       | 41,5573     | 1,6547                        | 3,46212E-05 | ENST00000356113 | LIP1       | lipase, hepatic                                                     |                                 |
| 5,39                | 5,57     | 5,19     | 6,04               | 6,23     | 6,08     | 41,9807      | 69,503      | 1,6556                        | 0,002939619 | NM_032315       | SLC25A33   | solute carrier family 25 (pyrimidine nucleotide carrier), member 33 |                                 |
| 4,21                | 4,69     | 4,51     | 5,49               | 4,89     | 5,19     | 22,3683      | 37,0323     | 1,6556                        | 0,04032141  | NR_027049       | ZNF788     | zinc finger family member 788                                       |                                 |
| 4,29                | 4,34     | 4,47     | 4,89               | 4,91     | 5,43     | 20,6587      | 34,2757     | 1,6591                        | 0,038604139 | NM_022117       | TSPYL2     | TSPYL-like 2                                                        |                                 |
| 7,65                | 7,68     | 7,65     | 8,3                | 8,51     | 8,36     | 202,2607     | 336,0957    | 1,6617                        | 0,0008313   | NM_021988       | UBE2V1     | ubiquitin-conjugating enzyme E2 variant 1                           |                                 |
| 4,69                | 4,54     | 4,63     | 5,37               | 5,26     | 5,43     | 24,6127      | 40,9283     | 1,6629                        | 0,000499966 | NM_001037540    | SCML1      | sex comb on midleg-like 1 (Drosophila)                              |                                 |
| 7,03                | 7,07     | 6,93     | 7,79               | 7,8      | 7,64     | 128,9973     | 214,5497    | 1,6632                        | 0,000524958 | NM_147188       | FBXO22     | F-box protein 22                                                    |                                 |
| 4,53                | 4,25     | 4,72     | 5,15               | 5,42     | 5,16     | 22,8283      | 38,0243     | 1,6657                        | 0,008970176 | ENST00000260229 | MMP27      | matrix metalloproteinase 27                                         |                                 |
| 6                   | 6,06     | 5,86     | 6,88               | 6,67     | 6,57     | 62,933       | 104,8743    | 1,6664                        | 0,004356398 | NM_016448       | DTL        | denticleless E3 ubiquitin protein ligase homolog (Drosophila)       |                                 |
| 8,51                | 8,6      | 8,37     | 9,22               | 9,2      | 9,28     | 361,1407     | 602,0487    | 1,6671                        | 0,000242876 | NM_002581       | PAPPA      | pregnancy-associated plasma protein A, pappalysin 1                 |                                 |
| 5,12                | 5,24     | 5,5      | 5,9                | 6,22     | 5,96     | 39,2743      | 65,5023     | 1,6678                        | 0,009063857 | NM_020799       | STAMBP1    | STAM binding protein-like 1                                         |                                 |
| 5,09                | 5,03     | 5,29     | 5,99               | 5,85     | 5,79     | 35,2853      | 58,856      | 1,668                         | 0,001676309 | NM_005133       | RCE1       | RCE1 homolog, prenyl protein protease (S. cerevisiae)               |                                 |
| 5,76                | 6,04     | 5,86     | 6,44               | 6,77     | 6,67     | 59,3573      | 99,263      | 1,6723                        | 0,005722579 | NM_133436       | ASNS       | asparagine synthetase (glutamine-hydrolyzing)                       |                                 |

| Pre-miR-Ctrl (Log2) |          |          | Pre-miR-132 (Log2) |          |          | Average      |             | Fold Change (miR-132 vs Ctrl) | p-value     | Gene Assignment |              |                                                                      | Predicted miR-132 binding sites |
|---------------------|----------|----------|--------------------|----------|----------|--------------|-------------|-------------------------------|-------------|-----------------|--------------|----------------------------------------------------------------------|---------------------------------|
| Sample 1            | Sample 2 | Sample 3 | Sample 1           | Sample 2 | Sample 3 | Pre-miR-Ctrl | Pre-miR-132 |                               |             | Public id       | Symbol       | Name                                                                 |                                 |
| 5,06                | 5,14     | 5,06     | 5,8                | 5,81     | 5,88     | 33,993       | 56,9033     | 1,674                         | 4,21273E-05 | NM_032601       | MCEE         | methylmalonyl CoA epimerase                                          |                                 |
| 4,73                | 4,9      | 5,12     | 5,78               | 5,61     | 5,61     | 30,3903      | 50,876      | 1,6741                        | 0,002857133 | NM_052954       | CYYR1        | cysteine/tyrosine-rich 1                                             |                                 |
| 10,57               | 10,46    | 10,47    | 11,31              | 11,18    | 11,24    | 1449,0197    | 2425,9133   | 1,6742                        | 0,000176728 | NM_005570       | LMAN1        | lectin, mannose-binding, 1                                           |                                 |
| 7,1                 | 7,2      | 6,97     | 7,98               | 7,75     | 7,77     | 136,5287     | 228,6733    | 1,6749                        | 0,002393822 | ENST00000342502 | IKBIP        | IKBKB interacting protein                                            |                                 |
| 8,41                | 8,47     | 8,44     | 9,17               | 9,18     | 9,21     | 347,341      | 582,7637    | 1,6778                        | 3,28302E-06 | ENST00000433473 | PPT1         | palmitoyl-protein thioesterase 1                                     |                                 |
| 4,69                | 4,9      | 4,43     | 5,31               | 5,55     | 5,43     | 25,742       | 43,211      | 1,6786                        | 0,005284248 | ENST00000422053 | TRIB3        | tribbles homolog 3 (Drosophila)                                      |                                 |
| 5,26                | 5,13     | 5,36     | 6,15               | 5,99     | 5,85     | 38,1353      | 64,0833     | 1,6804                        | 0,003597763 | ENST00000333129 | FIGN         | fidgetin                                                             |                                 |
| 6,18                | 6,14     | 6,05     | 6,76               | 7,02     | 6,83     | 69,7613      | 117,314     | 1,6816                        | 0,00206591  | NM_001128431    | SLC39A14     | solute carrier family 39 (zinc transporter), member 14               |                                 |
| 5,21                | 4,95     | 4,83     | 5,66               | 5,93     | 5,66     | 32,1223      | 54,0317     | 1,6821                        | 0,007026854 | NM_001264573    | KIF18B       | kinesin family member 18B                                            |                                 |
| 6,27                | 6,29     | 6,42     | 7,15               | 6,99     | 7,1      | 80,3493      | 135,4427    | 1,6857                        | 0,00042697  | NR_046478       | FKBP14       | FK506 binding protein 14, 22 kDa                                     |                                 |
| 8,51                | 8,73     | 8,58     | 9,42               | 9,4      | 9,28     | 390,6167     | 660,7583    | 1,6916                        | 0,000526692 | NM_002392       | MDM2         | Mdm2, p53 E3 ubiquitin protein ligase homolog (mouse)                |                                 |
| 6,54                | 6,75     | 6,38     | 7,4                | 7,27     | 7,31     | 94,6583      | 160,641     | 1,6971                        | 0,001347413 | NM_014750       | DLGAP5       | discs, large (Drosophila) homolog-associated protein 5               |                                 |
| 5,75                | 5,66     | 5,6      | 6,2                | 6,54     | 6,54     | 50,961       | 86,5417     | 1,6982                        | 0,006023066 | ENST00000361288 | TAF11        | TAF11 RNA polymerase II, TATA box binding protein (TBP)-assoc        |                                 |
| 5,15                | 4,58     | 3,99     | 5,43               | 5,38     | 5,44     | 25,1043      | 42,7217     | 1,7018                        | 0,036934487 | NR_001447       | MT1L         | metallothionein 1L (gene/pseudogene)                                 |                                 |
| 6,82                | 6,82     | 6,5      | 7,6                | 7,43     | 7,43     | 105,494      | 179,6347    | 1,7028                        | 0,002034539 | ENST00000303383 | SHCBP1       | SHC SH2-domain binding protein 1                                     |                                 |
| 4,83                | 4,13     | 4,35     | 5,07               | 5,54     | 5,04     | 22,115       | 37,6727     | 1,7035                        | 0,047619707 | AK130707        | LOC100128130 | uncharacterized LOC100128130                                         |                                 |
| 5,15                | 5,13     | 4,94     | 5,97               | 5,88     | 5,67     | 33,7397      | 57,4963     | 1,7041                        | 0,003306112 | NM_031217       | KIF18A       | kinesin family member 18A                                            |                                 |
| 6,64                | 6,36     | 6,66     | 7,36               | 7,32     | 7,31     | 94,3323      | 160,916     | 1,7058                        | 0,000466203 | NM_181342       | FKBP7        | FK506 binding protein 7                                              |                                 |
| 7,19                | 6,59     | 6,3      | 7,53               | 7,29     | 7,7      | 107,049      | 183,086     | 1,7103                        | 0,038487725 | NR_027054       | MIR31HG      | MIR31 host gene (non-protein coding)                                 |                                 |
| 6,97                | 7,38     | 7,3      | 7,6                | 8,17     | 8,17     | 149,8413     | 256,6807    | 1,713                         | 0,033967394 | NM_199054       | MKNK2        | MAP kinase interacting serine/threonine kinase 2                     |                                 |
| 9,37                | 9,3      | 8,82     | 9,98               | 9,68     | 10,19    | 581,325      | 999,4467    | 1,7193                        | 0,025188572 | ENST00000364102 | RNU5A-8P     | RNA, U5A small nuclear 8, pseudogene                                 |                                 |
| 5,37                | 5,35     | 5,65     | 6,41               | 6,22     | 6,09     | 44,118       | 75,8997     | 1,7204                        | 0,005394338 | ENST00000289352 | HIST2H4B     | histone cluster 2, H4b                                               | Yes                             |
| 6,15                | 6,07     | 6,36     | 6,93               | 6,9      | 7,11     | 73,4443      | 126,5023    | 1,7224                        | 0,001986276 | NM_016262       | TUBE1        | tubulin, epsilon 1                                                   |                                 |
| 5,68                | 5,68     | 5,52     | 6,21               | 6,5      | 6,52     | 49,4743      | 85,437      | 1,7269                        | 0,003875829 | NM_007175       | ERLIN2       | ER lipid raft associated 2                                           |                                 |
| 5,8                 | 5,46     | 5,75     | 6,28               | 6,62     | 6,48     | 51,183       | 88,444      | 1,728                         | 0,005960207 | NM_004793       | LONP1        | lon peptidase 1, mitochondrial                                       |                                 |
| 6,83                | 6,95     | 6,84     | 7,88               | 7,68     | 7,39     | 117,325      | 202,7907    | 1,7285                        | 0,012633639 | NR_003210       | SNORD114-17  | small nucleolar RNA, C/D box 114-17                                  |                                 |
| 4,6                 | 4,99     | 4,93     | 5,78               | 5,38     | 5,74     | 28,838       | 50,0123     | 1,7343                        | 0,011639904 | NM_002758       | MAP2K6       | mitogen-activated protein kinase kinase 6                            |                                 |
| 4,85                | 4,81     | 4,58     | 5,34               | 5,86     | 5,38     | 26,9363      | 46,7427     | 1,7353                        | 0,028088009 | NM_001171690    | GCAT         | glycine C-acetyltransferase                                          |                                 |
| 5,17                | 4,62     | 4,93     | 5,9                | 5,65     | 5,59     | 30,3587      | 52,6983     | 1,7359                        | 0,009975691 | NM_001123375    | HIST2H3D     | histone cluster 2, H3d                                               |                                 |
| 5,63                | 5,19     | 4,98     | 6,11               | 6,22     | 5,92     | 39,195       | 68,054      | 1,7363                        | 0,012758923 | NM_014061       | MAGEH1       | melanoma antigen family H, 1                                         |                                 |
| 8,67                | 8,58     | 8,51     | 9,49               | 9,3      | 9,37     | 384,851      | 670,369     | 1,7419                        | 0,000579834 | NM_015696       | GPX7         | glutathione peroxidase 7                                             |                                 |
| 4,75                | 4,69     | 4,5      | 5,75               | 5,4      | 5,14     | 25,1163      | 43,7673     | 1,7426                        | 0,028485512 | ENST00000262067 | TSPAN13      | tetraspanin 13                                                       |                                 |
| 7,21                | 6,81     | 6,83     | 7,95               | 7,69     | 7,63     | 124,678      | 217,2893    | 1,7428                        | 0,008459035 | NM_002426       | MMP12        | matrix metalloproteinase 12 (macrophage elastase)                    |                                 |
| 6,53                | 6,62     | 6,45     | 7,39               | 7,19     | 7,42     | 92,7327      | 161,6677    | 1,7434                        | 0,00125852  | NM_020375       | C12orf5      | chromosome 12 open reading frame 5                                   |                                 |
| 6,77                | 6,97     | 6,87     | 7,57               | 7,7      | 7,75     | 117,1577     | 204,4083    | 1,7447                        | 0,000591999 | NM_006623       | PHGDH        | phosphoglycerate dehydrogenase                                       |                                 |
| 5,74                | 5,24     | 5,92     | 6,56               | 6,35     | 6,48     | 50,5953      | 88,3963     | 1,7471                        | 0,007918768 | NM_052885       | SLC2A13      | solute carrier family 2 (facilitated glucose transporter), member 13 |                                 |
| 7,79                | 7,82     | 7,87     | 8,62               | 8,55     | 8,73     | 227,0783     | 397,6193    | 1,751                         | 0,000340296 | NM_002592       | PCNA         | proliferating cell nuclear antigen                                   |                                 |
| 6,16                | 6,31     | 6,56     | 7,24               | 7,14     | 7,11     | 81,7333      | 143,4507    | 1,7551                        | 0,001366556 | ENST00000518109 | ENPP2        | ectonucleotide pyrophosphatase/phosphodiesterase 2                   |                                 |
| 8,78                | 8,89     | 8,91     | 9,66               | 9,7      | 9,66     | 465,0117     | 816,5833    | 1,756                         | 1,92541E-05 | NM_139276       | STAT3        | signal transducer and activator of transcription 3 (acute-phase res  |                                 |
| 5,74                | 5,81     | 5,64     | 6,63               | 6,48     | 6,52     | 53,1387      | 93,3603     | 1,7569                        | 0,000307535 | XR_110188       | LOC100507624 | uncharacterized LOC100507624                                         |                                 |

| Pre-miR-Ctrl (Log2) |          |          | Pre-miR-132 (Log2) |          |          | Average      |             | Fold Change (miR-132 vs Ctrl) | p-value     | Gene Assignment |              |                                                                      | Predicted miR-132 binding sites |
|---------------------|----------|----------|--------------------|----------|----------|--------------|-------------|-------------------------------|-------------|-----------------|--------------|----------------------------------------------------------------------|---------------------------------|
| Sample 1            | Sample 2 | Sample 3 | Sample 1           | Sample 2 | Sample 3 | Pre-miR-Ctrl | Pre-miR-132 |                               |             | Public id       | Symbol       | Name                                                                 |                                 |
| 6,81                | 6,72     | 6,92     | 7,62               | 7,69     | 7,59     | 112,907      | 198,6307    | 1,7592                        | 0,000150638 | NM_001104587    | SLFN11       | schlafen family member 11                                            |                                 |
| 6,45                | 6,1      | 6,22     | 7,18               | 7,02     | 7,04     | 76,8547      | 135,465     | 1,7626                        | 0,001336298 | NM_001172774    | DPY19L3      | dpy-19-like 3 (C. elegans)                                           |                                 |
| 4,54                | 4,4      | 4,22     | 5,18               | 5,15     | 5,32     | 21,004       | 37,235      | 1,7728                        | 0,001065276 | NR_028370       | PCNA-AS1     | PCNA antisense RNA 1 (non-protein coding)                            |                                 |
| 5,78                | 5,97     | 6,02     | 6,6                | 6,71     | 6,93     | 60,8413      | 107,8783    | 1,7731                        | 0,004113601 | ENST00000364725 | RN5S132      | RNA, 5S ribosomal 132                                                |                                 |
| 5,83                | 5,44     | 5,43     | 6,42               | 6,34     | 6,46     | 47,8027      | 84,89       | 1,7758                        | 0,001747731 | NM_018018       | SLC38A4      | solute carrier family 38, member 4                                   |                                 |
| 6,14                | 6,01     | 6,21     | 7,03               | 6,91     | 6,91     | 69,665       | 123,736     | 1,7762                        | 0,000266473 | NM_001146276    | NCEH1        | neutral cholesterol ester hydrolase 1                                |                                 |
| 5,01                | 4,7      | 4,86     | 5,89               | 5,61     | 5,55     | 29,0853      | 51,6643     | 1,7763                        | 0,006087111 | ENST00000477593 | PIK3CB       | phosphoinositide-3-kinase, catalytic, beta polypeptide               |                                 |
| 7,1                 | 7        | 6,91     | 7,9                | 7,95     | 7,64     | 128,482      | 228,534     | 1,7787                        | 0,002984704 | NM_020354       | ENTPD7       | ectonucleoside triphosphate diphosphohydrolase 7                     |                                 |
| 7,99                | 7,72     | 7,76     | 8,67               | 8,6      | 8,72     | 227,2793     | 405,6723    | 1,7849                        | 0,000437241 | NM_006459       | ERLIN1       | ER lipid raft associated 1                                           |                                 |
| 9,05                | 9,09     | 8,89     | 9,92               | 9,87     | 9,75     | 516,4757     | 921,868     | 1,7849                        | 0,000455963 | ENST00000304414 | ARL6IP1      | ADP-ribosylation factor-like 6 interacting protein 1                 |                                 |
| 5,07                | 3,88     | 4,4      | 5,47               | 5,37     | 5,26     | 23,142       | 41,3327     | 1,786                         | 0,03506908  | ENST00000516687 | RN5S33       | RNA, 5S ribosomal 33                                                 |                                 |
| 4,77                | 5,04     | 4,99     | 5,54               | 5,93     | 5,84     | 30,6543      | 54,926      | 1,7918                        | 0,006476912 | NR_029631       | MIR218-1     | microRNA 218-1                                                       |                                 |
| 7,12                | 6,87     | 6,79     | 7,82               | 7,78     | 7,77     | 122,2443     | 221,3467    | 1,8107                        | 0,000376481 | NM_016072       | GOLT1B       | golgi transport 1B                                                   |                                 |
| 7,03                | 6,73     | 6,97     | 7,96               | 7,69     | 7,65     | 120,7363     | 218,7847    | 1,8121                        | 0,004412983 | ENST00000222543 | TFPI2        | tissue factor pathway inhibitor 2                                    |                                 |
| 6,78                | 7,06     | 7,03     | 7,49               | 7,87     | 8,05     | 124,674      | 226,246     | 1,8147                        | 0,017434565 | NM_031459       | SESN2        | sestrin 2                                                            |                                 |
| 5,19                | 4,75     | 5,51     | 6,27               | 5,94     | 5,9      | 36,3277      | 66,093      | 1,8194                        | 0,018391089 | NM_024518       | ULBP3        | UL16 binding protein 3                                               |                                 |
| 4,6                 | 4,73     | 4,59     | 5,61               | 5,13     | 5,72     | 24,9577      | 45,5223     | 1,824                         | 0,019293927 | ENST00000415664 | TPTE         | transmembrane phosphatase with tensin homology                       |                                 |
| 4,79                | 4,75     | 4,68     | 5,71               | 5,51     | 5,6      | 26,736       | 48,8063     | 1,8255                        | 0,000421635 | NM_145702       | TIGD1        | tigger transposable element derived 1                                |                                 |
| 4,9                 | 4,33     | 4,27     | 5,5                | 5,49     | 5,2      | 23,0873      | 42,3183     | 1,833                         | 0,011846236 | ENST00000547292 | LOC100506948 | uncharacterized LOC100506948                                         |                                 |
| 5,12                | 4,79     | 4,77     | 5,86               | 5,51     | 5,93     | 29,9083      | 54,8733     | 1,8347                        | 0,009339764 | NM_001001415    | ZNF429       | zinc finger protein 429                                              |                                 |
| 4,52                | 4,3      | 4,58     | 5,51               | 5,46     | 5,03     | 22,1863      | 40,753      | 1,8369                        | 0,012084566 | NM_020381       | PDSS2        | prenyl (decaprenyl) diphosphate synthase, subunit 2                  |                                 |
| 4,72                | 4,47     | 4,33     | 5,58               | 5,28     | 5,32     | 22,8763      | 42,212      | 1,8452                        | 0,004587825 | NM_001786       | CDK1         | cyclin-dependent kinase 1                                            |                                 |
| 5,88                | 5,65     | 5,77     | 6,68               | 6,69     | 6,59     | 54,558       | 100,7077    | 1,8459                        | 0,00015739  | NM_017423       | GALNT7       | UDP-N-acetyl-alpha-D-galactosamine:polypeptide N-acetylglact         |                                 |
| 4,56                | 4,57     | 4,7      | 5,56               | 5,37     | 5,57     | 24,444       | 45,3457     | 1,8551                        | 0,000618771 | NM_001160183    | ZNF138       | zinc finger protein 138                                              |                                 |
| 4,84                | 4,6      | 4,55     | 5,47               | 5,67     | 5,54     | 25,439       | 47,255      | 1,8576                        | 0,000985696 | NM_003093       | SNRPC        | small nuclear ribonucleoprotein polypeptide C                        |                                 |
| 5,53                | 5,89     | 5,71     | 6,58               | 6,53     | 6,73     | 52,618       | 98,078      | 1,864                         | 0,001262663 | NM_052831       | SLC18B1      | solute carrier family 18, subfamily B, member 1                      |                                 |
| 7,57                | 7,48     | 7,56     | 8,45               | 8,41     | 8,45     | 185,7507     | 346,5187    | 1,8655                        | 4,86682E-06 | NM_006207       | PDGFRL       | platelet-derived growth factor receptor-like                         |                                 |
| 5,02                | 5,17     | 5,13     | 5,99               | 6,05     | 5,99     | 34,4887      | 64,4577     | 1,869                         | 2,73799E-05 | NM_181785       | SLC46A3      | solute carrier family 46, member 3                                   |                                 |
| 5,86                | 5,66     | 5,97     | 6,67               | 6,74     | 6,81     | 57,109       | 106,9753    | 1,8732                        | 0,000421998 | ENST00000374692 | TMEM38B      | transmembrane protein 38B                                            |                                 |
| 7,32                | 7,03     | 7,16     | 8,04               | 8,06     | 8,14     | 144,4963     | 270,7187    | 1,8735                        | 0,000247398 | NM_022166       | XYLT1        | xylosyltransferase I                                                 |                                 |
| 4,72                | 4,83     | 4,32     | 5,8                | 5,56     | 5,22     | 24,9237      | 46,721      | 1,8746                        | 0,021015553 | AK126318        | FLJ44342     | uncharacterized LOC645460                                            |                                 |
| 6,25                | 5,48     | 6,15     | 6,64               | 6,87     | 7,18     | 63,9177      | 120,5707    | 1,8863                        | 0,025987843 | NR_024241       | FAM86DP      | family with sequence similarity 86, member D, pseudogene             |                                 |
| 6,37                | 6,83     | 6,57     | 7,5                | 7,55     | 7,51     | 97,1643      | 183,5667    | 1,8892                        | 0,000728217 | NM_003842       | TNFRSF10B    | tumor necrosis factor receptor superfamily, member 10b               |                                 |
| 6,51                | 6,2      | 6,05     | 7,25               | 7,08     | 7,26     | 76,971       | 146,9313    | 1,9089                        | 0,001745951 | NM_152729       | NT5DC1       | 5'-nucleotidase domain containing 1                                  |                                 |
| 4,55                | 4,81     | 4,36     | 5,31               | 5,56     | 5,67     | 24,0037      | 45,9207     | 1,9131                        | 0,005231657 | NM_024808       | BORA         | bora, aurora kinase A activator                                      |                                 |
| 4,83                | 4,75     | 4,92     | 5,66               | 5,93     | 5,74     | 28,542       | 54,9927     | 1,9267                        | 0,001241258 | NM_024430       | PSTPIP2      | proline-serine-threonine phosphatase interacting protein 2           |                                 |
| 5                   | 5,18     | 5,27     | 6,1                | 6,05     | 6,18     | 35,6127      | 69,1187     | 1,9408                        | 0,000226315 | NM_020663       | RHOJ         | ras homolog family member J                                          |                                 |
| 5,81                | 5,88     | 5,87     | 6,77               | 6,94     | 6,72     | 57,8267      | 112,4477    | 1,9446                        | 0,00051882  | NM_016027       | LACTB2       | lactamase, beta 2                                                    |                                 |
| 6,02                | 6,14     | 6,11     | 7,05               | 6,99     | 7,13     | 68,162       | 133,2333    | 1,9547                        | 9,37449E-05 | NM_201649       | SLC6A9       | solute carrier family 6 (neurotransmitter transporter, glycine), mem |                                 |
| 5,39                | 5,29     | 5,3      | 6,32               | 6,31     | 6,26     | 40,1513      | 78,6243     | 1,9582                        | 8,90484E-06 | ENST00000481661 | GPR135       | G protein-coupled receptor 135                                       |                                 |



| Pre-miR-Ctrl (Log2) |          |          | Pre-miR-132 (Log2) |          |          | Average      |             | Fold Change (miR-132 vs Ctrl) | p-value     | Gene Assignment |             |                                                                       | Predicted miR-132 binding sites |
|---------------------|----------|----------|--------------------|----------|----------|--------------|-------------|-------------------------------|-------------|-----------------|-------------|-----------------------------------------------------------------------|---------------------------------|
| Sample 1            | Sample 2 | Sample 3 | Sample 1           | Sample 2 | Sample 3 | Pre-miR-Ctrl | Pre-miR-132 |                               |             | Public id       | Symbol      | Name                                                                  |                                 |
| 4,36                | 5,01     | 4,75     | 5,57               | 5,92     | 5,63     | 26,5557      | 52,525      | 1,9779                        | 0,007922286 | NM_001195056    | DDIT3       | DNA-damage-inducible transcript 3                                     |                                 |
| 6,07                | 6,3      | 6,13     | 7,16               | 7,22     | 7,13     | 72,0033      | 144,0563    | 2,0007                        | 8,04851E-05 | ENST00000394053 | MTHFD2      | methylenetetrahydrofolate dehydrogenase (NADP+ dependent) 2           |                                 |
| 5,52                | 5,42     | 5,67     | 6,56               | 6,58     | 6,49     | 46,5383      | 93,3023     | 2,0048                        | 9,12251E-05 | NM_000153       | GALC        | galactosylceramidase                                                  |                                 |
| 5,5                 | 4,22     | 4,62     | 5,96               | 5,87     | 5,89     | 29,4937      | 60,0123     | 2,0348                        | 0,020012959 | NR_033801       | SLC9A7P1    | solute carrier family 9, subfamily A (NHE7, cation proton antiporter) |                                 |
| 4,7                 | 4,7      | 4,57     | 5,76               | 5,34     | 5,91     | 25,2453      | 51,6083     | 2,0443                        | 0,010822564 | NM_030919       | FAM83D      | family with sequence similarity 83, member D                          |                                 |
| 5,98                | 5,85     | 5,72     | 6,86               | 6,95     | 6,85     | 57,8363      | 118,3873    | 2,0469                        | 0,000110826 | NM_018394       | ABHD10      | abhydrolase domain containing 10                                      |                                 |
| 5,88                | 5,69     | 5,97     | 6,86               | 6,88     | 6,93     | 57,7333      | 118,628     | 2,0548                        | 7,74472E-05 | NM_016399       | TRIAP1      | TP53 regulated inhibitor of apoptosis 1                               |                                 |
| 5,46                | 5,38     | 5,3      | 6,42               | 6,3      | 6,57     | 41,6857      | 86,4767     | 2,0745                        | 0,000786324 | NM_203394       | E2F7        | E2F transcription factor 7                                            |                                 |
| 5,44                | 4,99     | 5,04     | 6,25               | 6,09     | 6,33     | 36,03        | 74,8927     | 2,0786                        | 0,001680358 | ENST00000377103 | THBD        | thrombomodulin                                                        |                                 |
| 4,47                | 4,5      | 4,02     | 5,36               | 5,66     | 5,15     | 20,3373      | 42,3797     | 2,0838                        | 0,010496456 | NM_001204818    | ZNF587B     | zinc finger protein 587B                                              |                                 |
| 6,4                 | 5,96     | 6,21     | 7,28               | 7,33     | 7,2      | 73,5757      | 154,4493    | 2,0992                        | 0,000435847 | ENST00000264107 | ITGA6       | integrin, alpha 6                                                     |                                 |
| 6,02                | 5,67     | 5,85     | 6,87               | 7,02     | 6,89     | 57,829       | 121,7867    | 2,106                         | 0,000359781 | NM_005729       | PPIF        | peptidylprolyl isomerase F                                            |                                 |
| 4,72                | 4,98     | 4,59     | 6,02               | 5,61     | 5,91     | 27,3327      | 57,954      | 2,1203                        | 0,004302914 | ENST00000359193 | HIST1H2AH   | histone cluster 1, H2ah                                               |                                 |
| 4,48                | 3,97     | 4,48     | 5,03               | 5,65     | 5,53     | 20,101       | 43,0303     | 2,1407                        | 0,016300496 | NM_030763       | HMG5        | high mobility group nucleosome binding domain 5                       |                                 |
| 8,93                | 9,26     | 8,93     | 10,16              | 10,2     | 10,18    | 529,537      | 1160,1473   | 2,1909                        | 0,000123558 | NM_058179       | PSAT1       | phosphoserine aminotransferase 1                                      |                                 |
| 5,91                | 5,99     | 5,69     | 7,07               | 6,91     | 7,02     | 58,4373      | 128,1367    | 2,1927                        | 0,000217426 | NM_138455       | CTHRC1      | collagen triple helix repeat containing 1                             |                                 |
| 5,84                | 6,58     | 6,19     | 7,37               | 7,43     | 7,34     | 75,3203      | 166,628     | 2,2123                        | 0,001388356 | NM_014278       | HSPA4L      | heat shock 70kDa protein 4-like                                       |                                 |
| 5,57                | 5,39     | 5,75     | 6,88               | 6,62     | 6,66     | 47,7517      | 105,7563    | 2,2147                        | 0,001139344 | NM_002203       | ITGA2       | integrin, alpha 2 (CD49B, alpha 2 subunit of VLA-2 receptor)          |                                 |
| 5,57                | 6,04     | 5,98     | 6,95               | 7,1      | 7,19     | 58,8077      | 135,615     | 2,3061                        | 0,000890113 | ENST00000446533 | CHAC1       | ChaC, cation transport regulator homolog 1 (E. coli)                  |                                 |
| 8,31                | 8,11     | 7,84     | 9,25               | 9,27     | 9,4      | 274,2577     | 633,9453    | 2,3115                        | 0,000402571 | ENST00000394485 | MT1X        | metallothionein 1X                                                    |                                 |
| 5,28                | 5,34     | 5,49     | 6,41               | 6,78     | 6,56     | 41,4333      | 96,4283     | 2,3273                        | 0,001818562 | ENST00000325617 | CLGN        | calmegin                                                              |                                 |
| 6,25                | 6,78     | 6,72     | 7,64               | 7,93     | 7,93     | 97,1417      | 229,072     | 2,3581                        | 0,001924189 | NM_019058       | DDIT4       | DNA-damage-inducible transcript 4                                     |                                 |
| 5,48                | 5,62     | 5,64     | 7,02               | 6,77     | 6,7      | 47,893       | 114,2973    | 2,3865                        | 0,001181645 | NM_145172       | WDR63       | WD repeat domain 63                                                   |                                 |
| 4,77                | 4,73     | 4,08     | 5,64               | 6,09     | 5,73     | 23,578       | 57,021      | 2,4184                        | 0,006927928 | NM_003383       | VLDLR       | very low density lipoprotein receptor                                 |                                 |
| 4,77                | 5,05     | 4,8      | 6,36               | 5,96     | 6,26     | 29,4233      | 73,676      | 2,504                         | 0,002055539 | NM_001902       | CTH         | cystathionase (cystathionine gamma-lyase)                             |                                 |
| 6,4                 | 6,32     | 6,14     | 7,67               | 7,66     | 7,67     | 78,288       | 203,1883    | 2,5954                        | 7,09618E-06 | NM_176870       | MT1M        | metallothionein 1M                                                    |                                 |
| 9,28                | 8,91     | 9,14     | 10,71              | 10,43    | 10,52    | 555,6263     | 1507,6667   | 2,7135                        | 0,000594246 | NM_002421       | MMP1        | matrix metalloproteinase 1 (interstitial collagenase)                 |                                 |
| 5,62                | 5,2      | 5,32     | 6,87               | 6,95     | 6,98     | 41,9617      | 122,2827    | 2,9142                        | 6,51343E-05 | NM_006727       | CDH10       | cadherin 10, type 2 (T2-cadherin)                                     |                                 |
| 4,82                | 4,27     | 5,09     | 6,66               | 6,24     | 5,96     | 27,1997      | 79,653      | 2,9285                        | 0,012605385 | NR_003224       | SNORD114-31 | small nucleolar RNA, C/D box 114-31                                   |                                 |
